# Supplementary material for: Organization of Historical Oceanic Overturnings on Cross-Sphere Climate Signals
Source: Research Square preprint supplement (doi:10.21203/rs.3.rs-6416696/v1), 2025-06-05
Supplement: Supplementary file 1 [file 52cd01c6dec7c1facb0e80e1.pdf]

**Organization of Historical Oceanic Overturnings on Cross-Sphere**

**Climate Signals**

by

Yingjing Jiang<sup>1</sup>, Shaoqing Zhang<sup>1\*</sup>, Yang Gao<sup>2\*</sup>, Lixin Wu<sup>1,3\*</sup>, Lv Lu<sup>1</sup>, Zikuan Lin<sup>1</sup>, Wenju Cai<sup>1,3</sup>, Deliang Chen<sup>4,5</sup>, L. Ruby Leung<sup>6</sup>, Bin Wang<sup>7</sup>, Xueshun Shen<sup>8</sup>, Mingkui Li<sup>1</sup>, Xiaolin Yu<sup>1</sup>, and Xiaopei Lin<sup>1</sup>

<sup>1</sup>Key Laboratory of Physical Oceanography, Ministry of Education/Frontiers Science Center for Deep Ocean Multispheres and Earth System/College of Oceanic and Atmospheric Sciences, Ocean University of China, Qingdao, China

<sup>2</sup>Frontiers Science Center for Deep Ocean Multispheres and Earth System/Key Laboratory of Marine Environmental Science and Ecology, Ministry of Education, Ocean University of China, Qingdao, China

<sup>3</sup>Laoshan Laboratory, Qingdao, China

<sup>4</sup>Department of Earth System Sciences, Tsinghua University, Beijing, China

<sup>5</sup>Department of Earth Sciences, University of Gothenburg, Gothenburg, Sweden

<sup>6</sup>Atmospheric, Climate, & Earth Sciences Division, Pacific Northwest National Laboratory, Richland, WA, USA

<sup>7</sup>Department of Atmospheric Sciences and International Pacific Research Center, University of Hawaii at Manoa, Honolulu, HI, USA

<sup>8</sup>The Center of Earth System Modeling and Prediction, CMA, Beijing, China

**Contents of this file**

Text S1–S3

References S1

Figures S1–S18

Tables S1–S3

28 **Text S1-S3:**

29 **Text S1: Convergent atmospheric and oceanic states in CDA estimates**

30 ***a*, Convergent atmospheric mean meridional circulation (AMMC) mean states**

31 The AMMC is denoted as the temporal mean atmospheric meridional stream function, which can be  
32 expressed following Sun & Zhou [68] and Jiang et al. [30] as:

33 
$$\psi = \frac{2\pi a \cos \phi}{g} \int_0^p \bar{v} dp. \quad (Eq. S1)$$

34 Here,  $\bar{v}$  is the zonal average meridional wind,  $p$  is the pressure,  $\phi$  is the latitude,  $g$  is the gravitational  
35 acceleration, and  $a$  is the radius of the Earth.

36 In a manner similar to the definition of the GMOC index (see **Methods**), we define the AMMC index as the  
37 linear regression coefficient of the monthly AMMC with respect to its temporal mean value obtained from  
38 ERA5.

39 **Figure S4** shows the root-mean-square error (RMSE) distributions of AMMC for model simulations and  
40 CDA estimates against ERA5. The large errors of model-simulated AMMC are distributed over the tropics and  
41 areas lying at 60°–80° S in the Southern Hemisphere (SH). The tropical error of CM2-HIS is larger than that  
42 of CESM-HIS, which can be attributed to the coarser resolution of the atmospheric model in CM2. The  
43 substantial errors in these regions could potentially affect the accuracy of subsequent analyses related to the  
44 AMMC and its interaction with other climate components. The observational constraint greatly reduces the  
45 error of the AMMC in both CDA experiments. The improvement in CM2-CDA is larger than that in CESM-  
46 CDA. This indicates that observational data play a crucial role in enhancing the accuracy of AMMC estimates,  
47 and the greater improvement in CM2-CDA suggests that it may benefit more from the incorporation of  
48 observational information as compared with CESM-CDA. The AMMC obtained via CDA is generally  
49 consistent with ERA5 (**Fig.S4e&f**), although it is a little weaker at high latitudes.

50 ***b*, Convergent ocean temperature and salinity estimates**

51 By analyzing the time series of ocean temperature and salinity at different depths (0–500, 500–2000, and  
52 2000–5000 m) over the latitude range of 60° S–60° N (as shown in **Fig.S1**), we note that, although systematic  
53 differences between CDA estimates (CESM-CDA and CM2-CDA) and the objective analysis product EN4  
54 exist, they are much smaller when compared with the differences between model simulations (CESM-HIS and  
55 CM2-HIS) and the EN4 product. Moreover, the phases in the variations of CDA-estimated ocean temperature  
56 and salinity are highly consistent with EN4.

57 We also present the results of other CDA experiments, namely CESM-CDA0 and CM2-CDA0, which were  
58 initialized with different initial conditions on January 01, 1978. These experiments have been evaluated in  
59 Jiang et al. [30].

60 Both CDA systems converge from different initial conditions that are produced from different coupled spin-  
61 up states (CESM-CDA0 starts from the historical simulation on 01-01-1869 and CM2-CDA0 starts from the  
62 previous assimilation on 01-01-1978 from Chang et al. [69]. This convergence indicates that the CDA method  
63 possesses a certain robustness in handling different initial setups, which is crucial for obtaining reliable and  
64 consistent results in the context of oceanographic studies.

65 Although coherent convergence of upper- and deep-ocean temperature and salinity in CDAs to the EN4  
66 observation product occurs, the CDA results are somewhat sensitive to the change in oceanic observing system  
67 as the Argo profiles are assimilated (see the period after 2000 in **Fig.S1c–d**). This sensitivity implies that  
68 further investigations are needed to understand how the CDA performance might be affected by different  
69 configurations of the oceanic observing system, and to develop strategies to mitigate potential uncertainties  
70 introduced by such changes.

## 71 ***c*, Convergent estimation of atmospheric work exerted on the ocean and oceanic heat fluxes to the** 72 **atmosphere**

73 To gain an understanding of the balance between the atmosphere and ocean achieved through CDA, we  
74 conduct an examination of air–sea interaction processes within the CDA framework. To quantitatively assess  
75 the atmospheric work exerted on the ocean ( $W_{A2O}$ ), we utilize the following formula based on Huang et al. [70]:

$$76 \quad W_{A2O} = \tau_x * u^o + \tau_y * v^o, \quad (Eq. S2)$$

77 where,  $(\tau_x, \tau_y)$  are the wind-stress at the sea surface and  $(u^o, v^o)$  are the sea surface currents (for verification  
78 with “observation”, we use geostrophic currents in this case).

79 **Figure S2** presents the error distributions of  $W_{A2O}$  for both model simulations and CDA results in comparison  
80 with the observed product, as well as the time series of the global mean  $W_{A2O}$ . The observed sea surface wind-  
81 stress is obtained from ERA5, while the geostrophic currents are derived from the Archiving, Validation and  
82 Interpretation of Satellite Oceanographic data (AVISO). **Figure S2a&b** shows that the errors of model  
83 simulations are substantial in low-latitude areas of the North Pacific, areas near 20° S in the Indian Ocean, and  
84 ACC areas of the Southern Ocean. The substantial errors in these regions may potentially lead to inaccuracies  
85 in subsequent analyses related to air–sea interaction processes and climate model predictions. In addition, the  
86 errors are also substantial in the areas of the Kuroshio, Gulf Stream, and near 10° S in the Pacific.

87 The much smaller errors of  $W_{A2O}$  obtained via CDA compared with the corresponding model simulation not  
 88 only indicate its superiority in approximating the actual situation but also suggest that it can provide more  
 89 reliable estimates for further studies on air–sea interaction dynamics. From the time series of the normalized  
 90  $W_{A2O}$ , we observe that the error of the CESM is approximately 1 mW/m<sup>2</sup> larger than that of the CM2. We also  
 91 note that, in addition to reducing the  $W_{A2O}$  bias, CDA substantially corrects the phases of  $W_{A2O}$  variability. This  
 92 correction is of great importance because it can enhance the accuracy of predicting air–sea interaction  
 93 phenomena based on  $W_{A2O}$ .

94 To analyze the oceanic heat flux to the atmosphere, we examine it through the surface turbulent heat flux  
 95 ( $HF_{O2A}$ ), which consists of sensible ( $Q_S$ ) and latent ( $Q_L$ ) heat fluxes as described by Cronin et al. [71]. The  
 96 relationship can be expressed as:

$$97 \quad HF_{O2A} = Q_S + Q_L. \quad (Eq.S3)$$

98 **Figure S3** plays a crucial role in illustrating the error distributions and RMSE time series of  $HF_{O2A}$  for both  
 99 model simulations and CDA results in comparison with ERA5. It provides valuable insights into the  
 100 performance of different models and CDA methods. We observe that large positive and negative values of  
 101  $HF_{O2A}$  errors are distributed over high latitudes of the North Atlantic and Southern Ocean ACC areas in model  
 102 simulations (**Fig.S3a&b**). The presence of such large positive and negative values of  $HF_{O2A}$  errors in these  
 103 regions may potentially lead to inaccuracies in predicting the response of the climate system to ocean–  
 104 atmosphere heat exchange and could affect subsequent analyses related to air–sea interaction dynamics.

105 There are also substantial errors in tropical oceans and areas of the Kuroshio and its extension, where strong  
 106 air–sea interactions occur [42]. The substantial reduction of heat flux errors by CDA compared with model  
 107 simulation, especially in high latitudes of the North Atlantic and ACC areas, indicates that CDA can effectively  
 108 correct inaccuracies in estimating the oceanic heat flux to the atmosphere. This improvement is of great  
 109 importance because it enhances the reliability of climate models in simulating the heat exchange process  
 110 between the oceans and atmosphere.

111 From the RMSE time series of  $HF_{O2A}$  (**Fig.S3e**), we observe that although the errors of CDAs are substantial  
 112 reduced compared with those of their corresponding model simulations, they still exhibit consistent variation  
 113 phases. This consistency implies that CDAs maintain a certain level of stability in estimating the oceanic heat  
 114 flux to the atmosphere, despite the reduction in error magnitudes.



## **Text S2: More evaluations of CDA-estimated GMOC mean state and variability**

### ***a*, Convergent upper-ocean circulations in CDA-estimated GMOC**

From **Fig.1a–d**, we note that although both CDA estimates generally result in consistent changes in circulation patterns, there are nuanced differences in the GMOC behaviors during the transitions from CESM-HIS to CESM-CDA and from CM2-HIS to CM2-CDA. Specifically, the transport center between 10° and 30° S within the 500–2000 m depth range is more intense in CESM-CDA than in CM2-CDA, by at least 5 Sv. Additionally, the transport associated with the North Atlantic Deep Water (NADW) is somewhat stronger in CM2-CDA than in CESM-CDA in terms of both its central strength and vertical penetration. Moreover, the southward return circulation in the deep ocean is considerably stronger in CM2-CDA than in CESM-CDA, especially for the branch at the equator.

To validate ocean current velocities at a depth range of 950–1150 m, we utilize the “observation” data derived from Argo-drift information [34], as shown in **Extend Data Fig.1**. As pointed out by Su et al. [34], there are widespread global discrepancies between modeled and observed mid-depth ocean currents. Here, we observe that, in general, the models underpredict current velocities globally, and this global underestimation may lead to inaccuracies in understanding the overall ocean circulation patterns and related physical processes. The underprediction is especially pronounced over the tropics and mid-latitudes.

The ocean current velocity distributions of SODA3 and ORAS5 are similar to that of CDA estimates, while ECCO4 is close to the model simulations, which underestimate the current velocity. From the perspective of average velocity, ECCO4 is too small, while CESM-CDA and CM2-CDA are closest to Argo-drifting compare to ocean reanalysis products. From the distribution of RMSE, CEMS-CDA and CM2-CDA are significantly smaller than SODA3 and ORAS5, especially in the ACC region of the southern hemisphere and between 35° N and 75° N in the northern hemisphere. This finding suggests that the circulation center of the CDA-estimated GMOC, located between 10° and 30° S at a depth range of 500–2000 m, is highly likely to be realistic.

### ***b*, Convergent deep-ocean circulations in CDA-estimated GMOCs**

In deep portions of the oceans, current velocities simulated by the models herein are generally small (as shown in **Fig.S5a&b**). Large-value regions are predominantly concentrated along the western boundary of the Atlantic and in the Antarctic Circumpolar Current (ACC) areas, with a maximum velocity reaching 2 cm/s. In contrast, in other regions, the velocities of ocean currents are generally less than 0.5 cm/s.

We note that in open deep-ocean regions, such as the Pacific and central South Atlantic, the current velocities of the CESM are larger than those of the CM2, and the CESM provides greater detail. This may be attributed

145 to the fact that the CESM has a slightly higher horizontal and vertical resolution compared with the CM2.

146 The deep-ocean currents estimated by CDA are substantially enhanced globally compared with the model  
147 simulations (**Fig.S5c&d**), although the increases in the ACC and WBC areas are relatively small. This accounts  
148 for the enhancement of the deep-circulation system of GMOC in CDA estimates.

149 Owing to the lack of observations in deep portions of the oceans below 2000 m, we are unable to determine  
150 whether this enhancement aligns with the real-world situation. However, considering the improvement in the  
151 1000-m current velocities, balanced atmosphere–ocean coupling system, and constraints on deep-ocean model  
152 biases, we infer that the deep-ocean current velocities of CDA approach real-world values.

### 153 **c, Decomposition of AMOC and IPMOC (Indo-Pacific meridional overturning circulation) of GMOC**

154 The AMOC, being an important component of GMOC, plays a crucial role in both local and global climates  
155 [72]. In **Fig.S6a–d**, the mean states of the AMOC for model simulations and CDA estimates are presented.  
156 Meanwhile, in **Fig.S6e–g**, the corresponding versions of ocean reanalysis products are presented. The mean  
157 states of the AMOC in CESM-HIS and CM2-HIS exhibit a similar characteristic, featuring northward flows in  
158 the upper 1000 m and southward flows in the 1500–3000 m depth range. The intensity of the upper circulation  
159 of the AMOC in CESM-HIS is marginally stronger than that in CM2-HIS. In contrast, the strength of the deep  
160 southward transport circulation in CM2-HIS is greater than that in CESM-HIS. The CDA process substantially  
161 enhances the AMOC, and it also generates a new circulation core at a depth of 1000 m and latitude of 20° S.  
162 Consequently, in both the CESM-CDA and CM2-CDA, the AMOC displays a “double-core” northward  
163 transport circulation structure, which can be attributed to an enhanced South Atlantic subtropical gyre.

164 From **Fig.S6e–g**, we observe that the features of the AMOC in ocean reanalysis products appear to be  
165 intermediate between those of the model simulations (**Fig.S6a&b**) and those of the CDAs (**Fig.S6c&d**).  
166 Compared with the model simulations, the AMOCs in ocean reanalysis products exhibit strengthened  
167 circulations in the upper 3000 m of the South Atlantic and relatively small southward transport circulations in  
168 deep tropical oceans. However, unlike in the CDAs, the strengthened South Atlantic circulations do not form  
169 an enclosed circulation core. Meanwhile, the circulation cores associated with the NADW in ocean reanalysis  
170 products appear to be similar with those of the model simulations, with the latter cores remaining above 3000  
171 m. In contrast, the corresponding CDA counterparts extend below 4000 m.

172 Besides presenting the IPMOCs for model simulations and CDA estimates, we also display the IPMOCs of  
173 ocean reanalysis products in **Fig.S6l–n**. Similar to the IPMOCs of the CDA estimates (as shown in **Fig.S6j&k**),  
174 the IPMOCs in ocean reanalysis products exhibit negative (southward transport) circulations, particularly in

175 ECCO4 and ORAS5, which are predominant over the area south of 40° N. This supports the hypothesis that  
176 the enhanced deep southward transport circulations in CDA-estimated GMOCs (shown in **Fig.1c&d**) primarily  
177 come from the data-constrained Indo-Pacific Oceans, and therefore, they are most likely realistic.

#### 178 **d, Coherent CDA-estimated ocean stratification with the observation**

179 Previous studies have suggested that balanced and coherent states of the atmosphere and oceans are crucial  
180 for reconstructing the three-dimensional flows and overturning circulations of the oceans through data  
181 assimilation [10,30]. Following the evaluation of the AMMC,  $W_{A20}$ , and  $HF_{O2A}$  in **Text S1**, we investigate the  
182 ocean temperature, salinity, and potential density estimated by CDA herein to clarify the coherence of ocean  
183 stratification within our balanced CDA estimates.

184 We compute the RMSE reduction rates of potential density within the CDA framework relative to the ocean  
185 reanalysis results (SODA3, ECCO4, and ORAS5), with the latter being verified against the WOA (as depicted  
186 in **Fig.S7**). In comparison with the results of ocean reanalysis, the RMSE of potential density in most areas of  
187 the two CDAs significantly declines, particularly below 2000 m, with a reduction rate ranging from 60% to  
188 80%. This finding indicates that in areas where observational data are scarce in the deep oceans, employing  
189 stronger restoration schemes can mitigate deep-ocean model biases and lead to balanced and coherent ocean  
190 stratification. In the upper middle ocean (0–2000 m), the CDA-estimated potential density, employing  
191 multiscale filtering assimilation, is also improved in many areas, especially when compared with ECCO4 and  
192 ORAS5.

#### 193 **e, Observation-convergent geostrophic GMOC mean states in CDA**

194 The geostrophic GMOC displays a general characteristic of positive (northward-transport) circulations in  
195 the SH and negative (southward-transport) circulations in the NH, as shown in **Fig.S8**. However, in the SH,  
196 although the geostrophic GMOCs in CDA estimates, ocean reanalysis products, and the “observation” are  
197 characterized by a large positive circulation with a small negative center in the upper 500 m of the subtropics,  
198 the positive circulation in model simulations is much smaller and weaker, and vice versa for the negative  
199 circulation. In the NH, although the CDA-estimated geostrophic GMOCs exhibit negative, positive, and  
200 negative patterns in the upper 1000 m at low, middle, and high latitudes, respectively, similar to those of ocean  
201 reanalysis products and the “observation”, the patterns in model simulations are particularly weak, especially  
202 in the tropics within CESM-HIS.

203 The above analyses are substantiated by the distributions of differences between the two model GMOCs,

those between the two CDA-estimated GMOCs, and those among the ocean reanalysis products, as depicted in **Fig.S8**. The strong geostrophic transport in the SH may be attributed to the more open nature of the oceans in the SH, while the weaker geostrophic transport in the NH may be attributed to the more complex ocean basin structure in the NH. Owing to common discretization features, such as an approximately 100 km horizontal resolution, free model simulations tend to produce generally similar GMOC patterns. However, these patterns deviate substantially from the real world owing to the approximation of physics and omission of certain scales in the models. Our CDA results with independent models suggest that multiscale data–model incorporation, consisting of deep-ocean bias treatment, can recover the GMOC mean state by a credible degree.

#### **f, Standard deviation (STD) of GMOC**

In **Fig.S9**, we show the STD values of the GMOCs for model simulations and various assimilation products. In general, large STD values of the GMOC are predominantly located in the ACC (Antarctic Circumpolar Current residual circulation), tropical, and NADW areas. However, these values are relatively lower in model simulations but much higher in ocean reanalysis products, particularly in the ACC-RC region and tropics of SODA3 and ECCO4.

Although the distribution patterns of GMOC STD values for the two CDAs and ORAS5 exhibit a generally similar characteristic, featuring high values in the tropics, deep penetration in the ACC-RC area, and relatively high values at high-latitudes of the NH, the patterns of SODA3 and ECCO4 deviate from this characteristic. Among the seven GMOC STD distributions, which include two model simulations, two CDA estimates, and three ocean reanalysis products, the two CDA estimates exhibit the same distribution centers. However, the values in CM2-CDA are larger than those in CESM-CDA (as can be seen by comparing in **Fig.S9c&d**).

We also compare the STD values of AMOCs, as shown in **Fig.S10**. The STD values of model simulations are smaller than those of assimilation results. Both CEMS-HIS and CM2-HIS exhibit a similar structure, in which, the maximum values are located in the North Atlantic at approximately 40° N and a depth of 1000–2000 m. In contrast, the maximum STD values of CESM-CDA and CM2-CDA are located in tropical oceans at a depth of 500–1500 m, comparable with those of the ocean reanalysis products SODA3 and ORAS5.

#### **g, Convergent GMOC variability in CDA estimates**

To assess GMOC variability, we calculate the linear regression coefficient between GMOC states at each time slice and their mean state as a GMOC index, measuring the departure of an instant from the mean (see **Methods**). The timeseries of GMOC indices for CESM-HIS, CM2-HIS, CESM-CDA, CM2-CDA and the

mean of three reference ocean reanalysis products are displayed in **Extend data Fig.2a**. Model-simulated GMOC timeseries show little correlation (0.04), whereas the CDA-estimated GMOC timeseries are highly correlated (0.59, far above the 99% significance for 960 degrees of freedom, see **Methods**). We first check the volume transports at 47°, 26°, and 16° N in the Atlantic (where long-term observations exist), as shown in **Extend data Fig.2b–d**. The CDA- and reanalysis-estimated transports align well with observations in all three cross-sections, substantially outperforming model simulations and exhibiting correlation above the 99% significance level. All data-constrained estimates fit best at the 26° N RAPID cross-section (compare **Extend data Fig.2c** with **Extend data Fig.2b&d**), likely owing to the dominance of large-scale circulations in the mid-latitude Atlantic, which facilitates data constraints. For cross-sections at different latitudes, CDA and ocean reanalyses perform differently. In mid-to-high latitudes, both CDA estimates and ocean reanalyses show comparable quality. However, at low latitudes, CDA substantially outperforms ocean reanalysis products. This suggests that in the tropics, where air-sea interactions are highly active, the coupled data assimilation improves the efficiency of model–data integration, enhancing analysis quality.

Given the lack of direct and systematic observations on ocean currents, we evaluate the CDA-estimated GMOC by verifying its geostrophic component (see **Methods**). We further assess the variability of the CDA-estimated GMOCs by verifying their geostrophic components against “observed” geostrophic timeseries derived from an observational dataset (e.g., EN4) [35] using monthly ocean temperature and salinity data. Given that model simulations, CDA estimates, and ocean reanalysis products may have varying compositions of geostrophic and non-geostrophic components, we examine the behavior of geostrophic GMOCs across different timescales (**Extend data Fig.2e–g**). In free model simulations, aside from some correlation in the temporal mean geostrophic distribution with “observations,” as expected, no correlation in variability is observed at any scale. Overall, the CDA constraint greatly improves the capability of model’s geostrophic fitting, particularly in the low-frequency band. However, as timescales shorten, geostrophic fitting becomes more challenging (**Extend data Fig.2g**). At the decadal scale, CDA estimation shows slightly better skill than ocean reanalysis (0.66 vs. 0.64 for 6–10-yr mean correlation). In contrast, ocean reanalysis performs better at the interannual scale (0.51 vs. 0.41 for 1–5-year mean correlation). These differences likely arise from the distinct approaches in information capture: ocean reanalysis relies on specified “observed” atmospheric fluxes, while CDA estimation operates within a coupled model framework, which has more uncertainties in atmospheric fluxes but achieves a greater atmosphere-ocean coupling balance.

### Text S3: Physical analysis of observation-convergent GMOC variability

#### *a*, Mechanisms of multiscale processes in maintaining GMOC

The GMOC is the consequence of maintaining an atmosphere–oceans balance. As important components of the Earth system, the oceans and atmosphere interact with each other in multiscale processes (**Extend Data Fig.3**). Excluding various dissipation mechanisms, the coupled atmosphere and oceans on Earth can be regarded as a semi-enclosed system [73]. In this system, the atmosphere “stirs” the oceans, while the oceans feed back to the atmosphere with updated boundary conditions that have redistributed thermal properties [74]. If the coupled atmosphere–oceans system is reduced to a two-dimensional space in the vertical and meridional directions, the atmosphere and oceans can still be viewed as a pair of zonally-averaged self-constrained counterparts, such as the AMMC [75] and GMOC [1]. The AMMC consists of Hadley, Ferrel, and Polar cells, corresponding to Earth’s surface wind systems, including the trade winds and westerlies, among others (**Extend Data Fig.3a**). Under the joint influences of atmospheric wind stress, Coriolis force, and topography, the oceans ultimately form a complex circulation system (**Extend Data Fig.3b**). Ocean water upwells in the Southern Ocean under wind-driven Ekman effects, and flows northwards to high-latitudes in the Northern Hemisphere (NH), then sinks owing to evaporation and cooling, forming the NADW that continuously transports southwards as the return flow. There are abundant and complex mixing and dissipation processes in the tropics. The variation mechanism of GMOC can be summarized as a three-term balance model [2] (**Extend Data Fig.3c**), i.e., the residual between the difference in northern sinking and southern upwelling, subtracting tropical diffusive mixings, drives the change in pycnocline depth anomaly.

However, owing to imperfect Earth modeling and observational systems [35,76], a complete picture of the historical AMMC–GMOC mean state and variability has yet to be established. Owing to suboptimal discretization and physical schemes in climate models [77], the three-dimensional motion of ocean water simulated by models is different from that in the real world [78]. Models tend to simulate a pair of AMMC–GMOC structures with different features in their own model spaces [30]. The model GMOC is unable to represent the transport of heat, freshwater, carbon, and nutrients between the hemispheres in the real world. Moreover, measurements of ocean states are very limited [79], usually focusing on the ocean surface [80], or otherwise only available as in-situ temperature and salinity profiles for the subsurface [81]. In this study, we attempt to discover the degree to which a CDA approach can establish the AMMC–GMOC mean state and variability in a coherent and balanced manner of model–data incorporation.

We show the mean states of NADW (**Fig.1g–l**), ACC-RC (**Fig. S11**) and tropical diffusive mixing (**Fig. S12**).

For NADW, both CDA estimates produce a nearly identical isopycnal structure with the observation while ORAS5 only displays somewhat improvement from free model simulations. For ACC-RC, CDA constraints weaken the northward transport between 65°–45° S and strengthen the southward transport around 45° S at 1000–2000 m depth from free model simulations, bringing the CDA ACC-RC mean state closer to the “observation” (**Fig.S11**). Since ocean reanalysis uses “observational” atmospheric fluxes, it is expected that ORAS5 shows the best fit for the mean ACC-RC features. For tropical diffusive mixing ( $\epsilon_m$ ), while the model simulations appear very weak, especially in CESM, both CDA estimates greatly enhance  $\epsilon_m$  in the regions of tropical instability waves, WBCs, and the southern and northern equatorial currents across the Pacific, Atlantic, and Indian basins, bringing the estimates close to the level of high-resolution (25 km) ORAS5 ocean reanalysis (**Fig.S12**).

### **b, Decomposition of multiscale GMOC modes**

In **Fig.S14a&e**, we present the 1–20-yr band-pass filtered time series of the AMMC and GMOC. Similar to the case of GMOCs in CESM-HIS and CM2-HIS, the time series of AMMCs in CESM-HIS and CM2-HIS are almost uncorrelated, with a correlation coefficient of  $-0.01$ . While the variabilities of CESM-CDA and CM2-CDA are highly correlated, with a correlation coefficient of  $0.51$ . On interannual to multidecadal scales, the variability of the CDA-estimated AMMC approximates to the “observed” product derived from ERA5 reanalysis. Meanwhile, the variability of the GMOC approximates the mean of the three ocean reanalysis products.

In **Fig.S14b–d**, we present the 1–20-yr band-pass filtered time series of the North Atlantic Oscillation (NAO) index, Southern Oscillation Index (SOI), and Southern Annular Mode (SAM) index. Additionally, in **Fig.S14f&h**, we present the 1–20-yr band-pass filtered time series of NADW,  $\epsilon_m$  and ACC-RC.

The NAO employs a PC-based index, which is the time series of the leading EOF of sea level pressure (SLP) anomalies over the Atlantic sector within the range of 20°–80° N and 90° W–40° E, as defined by Hurrell & Deser [82]. The SOI is a time series that represents the monthly SLP difference between Tahiti and Darwin in the tropical Pacific, as described by Trenberth & Hoar [83]. The SAM also employs a PC-based index, which is the time series of the leading EOF of SLP anomalies over the SH within the range of 40°–65° S, as specified by Marshall [84].

Similar to the cases of the AMMC and GMOC mentioned previously, the variabilities of the NAO, SOI, SAM, NADW,  $\epsilon_m$ , and ACC-RC in CESM-HIS and CM2-HIS are discrepant. In contrast, those in CESM-CDA and CM2-CDA converge. The NAO, SOI, and SAM estimated by CDA are in line with the ERA5



“observational” result. Furthermore, the NADWs of the two CDAs converge to the objective analysis product EN4 on decadal and multidecadal scales. However, the variabilities of the model simulations and ORAS5 are discrepant and deviate substantially from those of EN4. Moreover, the ACC-RCs of the CDAs are highly in line with both EN4 and ORAS5 on the interannual scale, corresponding to the interannual variability of wind stress. It is worth mentioning that the  $\varepsilon_m$  time series of CESM-CDA and CM2-CDA are essentially consistent after 1978, especially with regard to changes on interdecadal and annual scales.

#### **c, Composite GMOC variability by NADW, ACC-RC and $\varepsilon_m$**

We perform EOF analysis on the GMOC stream functions in the regions north of 30° N, between 30° S and 30° N, and south of 30° S, which are referred to as GMOC<sup>n</sup>, GMOC<sup>t</sup>, and GMOC<sup>s</sup>, respectively. Then, in **Fig.3a–i**, we present the time series of the first PC (PC1) obtained from the EOF decomposition of GMOC<sup>n</sup>, GMOC<sup>t</sup>, and GMOC<sup>s</sup>, along with the band-pass filtered NADW,  $\varepsilon_m$ , and ACC-RC indices for CESM-HIS, CESM-CDA, and ORAS5. The counterparts in CM2-HIS and CM2-CDA are presented in **Extend Data Fig.6**.

With the exception of the CESM-HIS case, in all instances of free model simulations and data-constrained products, the PC1s of GMOC<sup>n</sup>, GMOC<sup>t</sup>, and GMOC<sup>s</sup> are substantially correlated with the NADW,  $\varepsilon_m$ , and ACC-RC indices, respectively. The low correlation between the GMOC<sup>n</sup> of CESM-HIS and NADW may be ascribed to the specific model deficiency in the North Atlantic [41]. This deficiency is largely rectified by the CDA data constraints, as can be seen by comparing **Extend Data Fig.6a&b**. In all data-constrained products, the correlation between the GMOC<sup>s</sup> and ACC-RC is highest, while that between the GMOC<sup>t</sup> and  $\varepsilon_m$  is lowest; the correlation between the GMOC<sup>n</sup> and NADW lies between these two. The mean correlations for the three cases in the data-constrained results, namely between GMOC<sup>s</sup> and ACC-RC, between GMOC<sup>n</sup> and NADW, and between GMOC<sup>t</sup> and  $\varepsilon_m$ , are 0.73, 0.58, and 0.48, respectively. All these correlations far exceed the 99% significance level (which is approximately 0.12).

#### **d, More analysis of GMOC’s fingerprints on historic events**

Previous study [43] used a global mean SST (GMSST) residual (GMSSTr) index (a quadratic fit of GMSST is removed) to show the responses of observed GMSST on Mt. Agung (1963), Mt. Chichon (1982) and Mt. Pinatubo (1991) events, three major volcanic eruptions in the second half of the 20<sup>th</sup> century. They found that the cold GMSSTr anomalies caused by the Agung and Pinatubo volcanic eruptions have a long and profound influence on GMSST since they happen to have occurred at the descending period of a multidecadal GMSST variation. Particularly, the Pinatubo volcanic eruption was the 2<sup>nd</sup> largest event in the 20<sup>th</sup> century and the 8<sup>th</sup>



352 in history [85], and it had even more profound impacts on global climate compared to the Agung volcanic  
353 eruption. Nevertheless, the Chichon volcanic eruption occurred in the ascending period of a GMSST decadal  
354 variation and it only produced a short period of cold abnormality for GMSST.

355 Following that, we first define the global mean sea surface temperature residual (GMSSTr) to identify the  
356 SST's fingerprint on prominent volcanic eruption events. The GMSST is an area-weighted mean of 8-year  
357 low-passed SST anomalies between 40°S and 60°N and the GMSSTr is obtained by removing the quadratic fit  
358 from the GMSST. Then we define a quantity of North Atlantic SST residual (NASSTr) to examine the  
359 relationship of NASST anomaly and NADW. The calculation of NASSTr is the same as that of GMSSTr but  
360 for only limited in the Northern Atlantic Ocean over the area of 55°–35° W and 45°–65° N.

361 **Figure S15a** shows the 8-year low-passed GMSSTr of CDA estimates and the observation which is  
362 consistent with Liguori et al. [43]. Affected by the volcanic eruptions of Mt. Agung (1963), Mt. Chichon (1982)  
363 and Mt. Pinatubo (1991), the global mean sea surface temperature anomaly (SSTA) showed a significant  
364 downward trend. This phenomenon shows consistent manifestations in CDA estimates and OBS.

365 **Figure S16** shows the distributions of SSTA during the periods of 1963–1965, 1982–1985 and 1991–1995  
366 for CESM-CDA and CM2-CDA. Similar with the observation of ERSSTv5 (Extended Reconstructed Sea  
367 Surface Temperature version 5) in **Fig.4a–c**, the global SST cooling produced by the eruption of Mt. Agung  
368 (1963) mainly occurred in the Southern Hemisphere. In the high-latitude areas of the North Atlantic, the SSTA  
369 shows a positive anomaly. This weakens the cooling and sinking of seawater related to local radiation, reduces  
370 the thickness of NADW, and leads to a decrease in the corresponding NADW index. However, the SST cooling  
371 caused by the eruptions of Mt. Chichon (1982) and Mt. Pinatubo (1991) is mainly in the Atlantic Ocean and  
372 the western Pacific Ocean. In the high-latitude waters of the North Atlantic, there are strong negative anomalies.  
373 **Fig.S15b** further confirms the different impacts of the three volcanic eruption events on the high-latitude  
374 regions of the North Atlantic. The continuous decrease in the NASSTr of Mt. Chichon (1982) and Mt. Pinatubo  
375 (1991) corresponds to the continuous increase in NADW, which reaches its maximum around 1997.

376 **Figure S17** shows the CDA-estimated AMMC anomaly distributions during 1963–1965 and 1991–1995  
377 corresponding to Agung and Pinatubo events, respectively. The AMMC anomaly distributions are close to the  
378 ERA5 (**Fig.4g&h**). From **Fig.S18**, it can be observed that during the period from 1961 to 1966, the amplitude  
379 of the SAM index fluctuated within a wide range. In contrast, between 1980 and 2000, its amplitude is notably  
380 small. This variation corresponds to the cooling of the SST in the Southern Ocean during the relevant event.  
381 Conversely, the amplitude of the NAO is relatively small from 1961 to 1966 but became considerably larger

382 from 1980 to 2000. Notably, there is a distinct upward trend in the NAO index following the eruptions of  
 383 Chichon and Pinatubo.

## 384 **References S1**

- 385 68. Sun Y, and Zhou TJ. How does El Niño affect the interannual variability of the boreal summer Hadley  
 386 circulation? *J Clim*, 2014, **27**, 2622–2642. <https://doi.org/10.1175/JCLI-D-13-00277.1>
- 387 69. Chang Y, Zhang S, Rosati A, Delworth T, and Stern W. An assessment of oceanic variability for 1960–  
 388 2010 from the GFDL ensemble coupled data assimilation. *Clim Dyn*, 2013, **40**, 775–803.  
 389 <https://doi.org/10.1007/s00382-012-1412-2>
- 390 70. Huang RX, Wang W, and Liu LL. Decadal variability of wind-energy input to the world ocean. *Deep*  
 391 *Sea Res. Part II: Topical Studies in Oceanography*, 2006, **53**(1), 31–41.  
 392 <https://doi.org/10.1016/j.dsr2.2005.11.001>
- 393 71. Cronin MF, Gentemann CL, Edson J, et al. Air-sea fluxes with a focus on heat and momentum. *Front*  
 394 *Mar Sci*, 2019, **6**, 430. doi:10.3389/fmars.2019.00430
- 395 72. Buckley MW, and Marshall J. Observations, inferences, and mechanisms of Atlantic meridional  
 396 overturning circulation variability: A review. *Rev Geo*, 2016, **54**, 5–63.  
 397 <https://doi.org/10.1002/2015RG000493>
- 398 73. Stommel H. Thermohaline convection with two stable regimes of flow. *Tellus*, 1961, **13**(2), 224–230.  
 399 <https://doi.org/10.1111/j.2153-3490.1961.tb00079.x>
- 400 74. Manabe S. Climate and the ocean circulation: I. The atmospheric circulation and the hydrology of the  
 401 Earth’s surface. *Mon Wea Rev*, 1969, **97**(11), 739–774. [https://doi.org/10.1175/1520-](https://doi.org/10.1175/1520-0493(1969)097<0739:CATOC>2.3.CO;2)  
 402 [0493\(1969\)097<0739:CATOC>2.3.CO;2](https://doi.org/10.1175/1520-0493(1969)097<0739:CATOC>2.3.CO;2)
- 403 75. Charney JG, and Drazin PG. Propagation of planetary scale disturbances from the lower into the upper  
 404 atmosphere. *J Geophys Res*, 1961, **66**, 83–109. <https://doi.org/10.1029/JZ066i001p00083>
- 405 76. Zhang, S., Xu, S., Fu, H., et al. Toward Earth system modeling with resolved clouds and ocean submesoscales  
 406 on heterogeneous many-core HPCs. *Natl. Sci. Rev.*, 10, nwad069 (2023). <https://doi.org/10.1093/nsr/nwad069>
- 407 77. Zhang, S. & Rosati, A. An inflated ensemble filter for ocean data assimilation with a biased coupled GCM.  
 408 *Mon. Wea. Rev.*, 138, 3905–3931 (2010). DOI: 10.1175/2010MWR3326.1
- 409 78. Griffies SM, Danabasoglu G, Durack PJ, et al. OMIP contribution to CMIP6: experimental and  
 410 diagnostic protocol for the physical component of the Ocean Model Intercomparison Project. *Geo Mod*  
 411 *Dev*, 2016, **9**(9), 3231–3296. [https://doi.org/10.1175/1520-0469\(1950\)007<0080:OTWDOC>2.0.CO;2](https://doi.org/10.1175/1520-0469(1950)007<0080:OTWDOC>2.0.CO;2)
- 412 79. Jayne SR, Roemmich D, Zilberman N, Riser SC, Johnson KS, Johnson GC, and Piotrowicz SR. The  
 413 Argo program: present and future. *Oceanography*, 2017, **30**(3), 18–28.  
 414 <https://doi.org/10.5670/oceanog.2017.213>
- 415 80. Donlon CJ, Martin M, Stark J, Robert-Jones J, Fiedler E, and Wimmer W. The operational sea surface  
 416 temperature and sea ice analysis (OSTIA) system. *Remote Sens Environ*, 2012, **116**, 140–158.  
 417 <https://doi.org/10.1016/j.rse.2010.10.017>

- 418 81. Abraham JP, Baringer M, Bindoff NL, et al. A review of global ocean temperature observations:  
419 Implications for ocean heat content estimates and climate change. *Rev Geo*, 2013, **51**(3), 450–483.  
420 <https://doi.org/10.1002/rog.20022>
- 421 82. Hurrell JW, and Deser C. North Atlantic climate variability: The role of the North Atlantic Oscillation. *J*  
422 *Mar Syst*, 2009, **78** (1), 28–41. <https://doi.org/10.1016/j.jmarsys.2009.11.002>
- 423 83. Trenberth K-E, and Hoar T-J. The 1990-1995 El Nino-Southern Oscillation event longest on record.  
424 *Geo Res Lett*, 1996, **23**, 57–60. <https://doi.org/10.1029/95GL03602>
- 425 84. Marshall GJ. Trends in the Southern Annular Mode from observations and reanalyses. *J Clim*, 2003, **16**,  
426 4134–4143. [https://doi.org/10.1175/1520-0442\(2003\)016<4134:TITSAM>2.0.CO;2](https://doi.org/10.1175/1520-0442(2003)016<4134:TITSAM>2.0.CO;2)
- 427 85. Ghose, T. The 12 biggest volcanic eruptions in recorded history. Live Science, Future US, Inc. Full 7th  
428 Floor, 130 West 42nd Street, New York, NY 10036 (2023). [https://www.livescience.com/planet-](https://www.livescience.com/planet-earth/volcanos/the-12-biggest-volcanic-eruptions-in-recorded-history)  
429 [earth/volcanos/the-12-biggest-volcanic-eruptions-in-recorded-history](https://www.livescience.com/planet-earth/volcanos/the-12-biggest-volcanic-eruptions-in-recorded-history).  
430

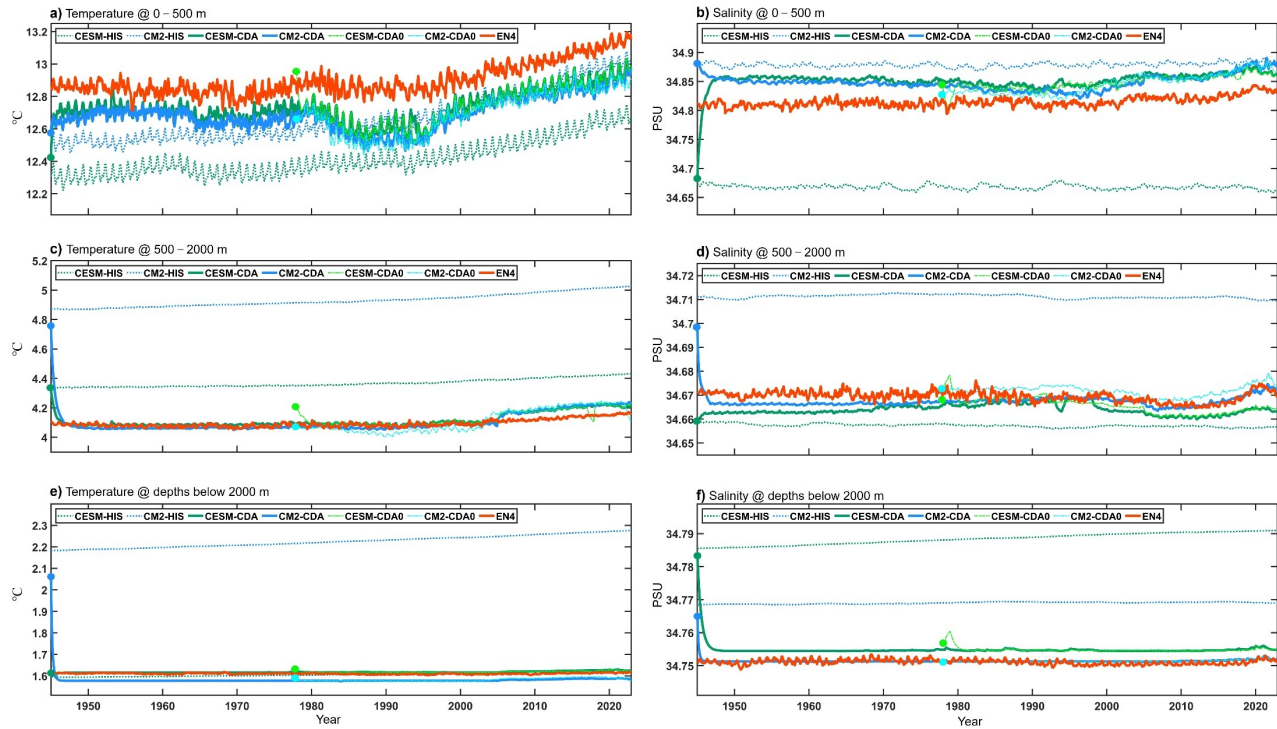

432  
433 **Fig. S1 | Convergent ocean temperature and salinity in coupled data assimilation (CDA) estimates. a–b)** Time  
434 series of **a)** mean temperature (unit: °C) and **b)** salinity (unit: PSU) over the area 60° S–60° N at 0–500 m ocean  
435 depth. The dashed light-green and light-blue lines represent other CDA experiments (CESM-CDA0 and CM2-  
436 CDA0) for the period 1978–2022 [30]. The restart initial condition (denoted by a light-green dot) of CESM-CDA0  
437 is the coupled model state at 00:00 UTC on 01-01-1978 of the historical model simulation running from 01-01-  
438 1869. The restart initial condition (denoted by a light-blue dot) of CM2-CDA0 is the previous assimilation coupled  
439 state at 00:00 UTC on 01-01-1978 [69]. **c–d)** Same as panels **a–b** but for 500–2000 m ocean depth. **e–f)** Same as  
440 panels **a–b** but for the ocean depths below 2000 m.

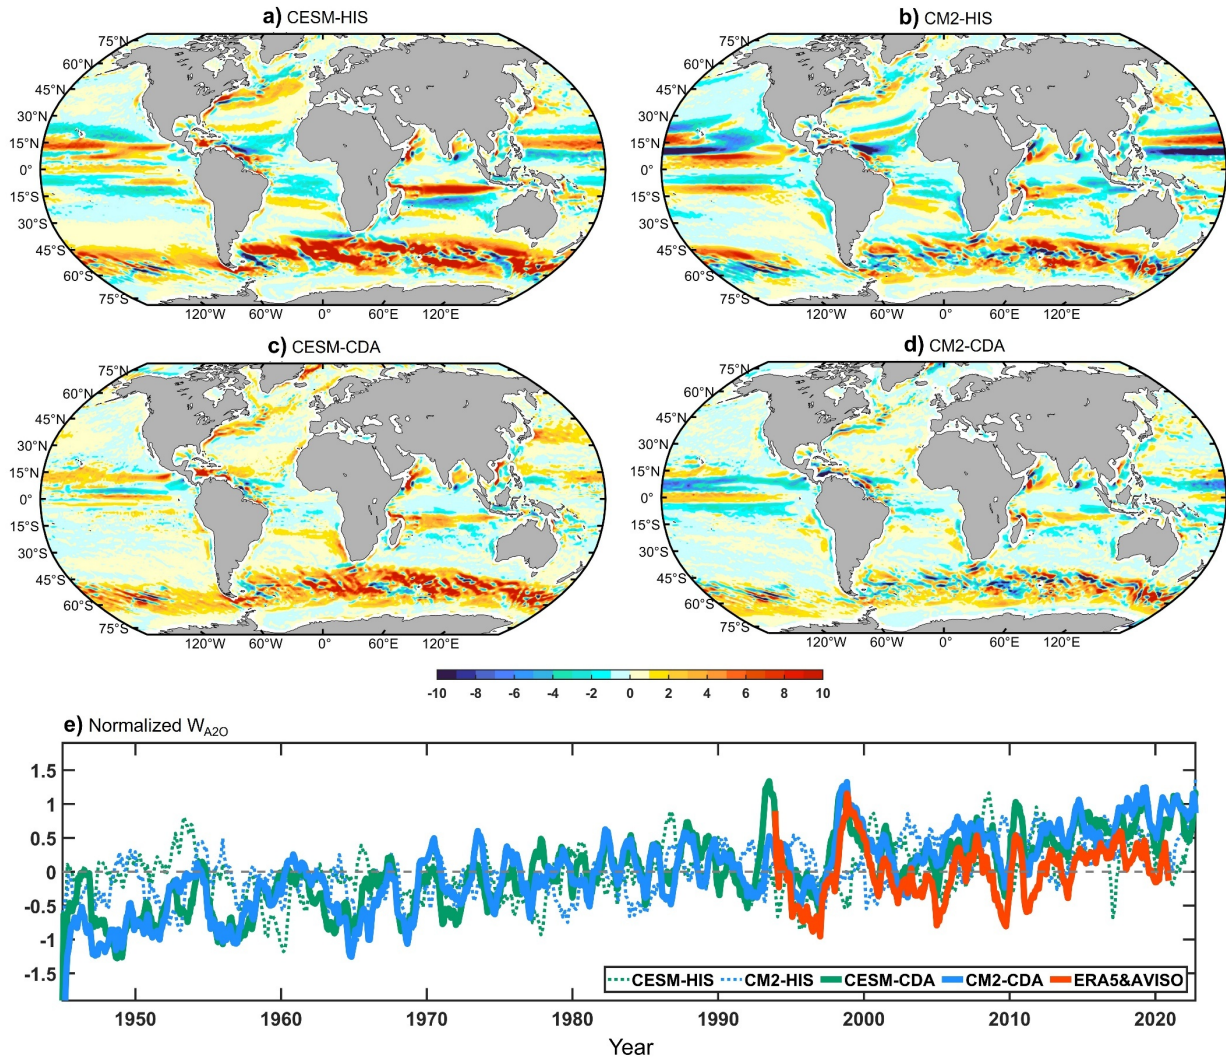

**Fig. S2 | Atmospheric work exerted on the oceans ( $W_{A2O}$ ).** a–d) Error distributions of  $W_{A2O}$  for CESM-HIS, CM2-HIS, CESM-CDA, and CM2-CDA, respectively, against the observed product derived from ERA5 and AVISO over the period 1993–2020 (unit:  $\text{mW/m}^2$ ). e) Normalized global mean time series of  $W_{A2O}$  in CESM-HIS (green dotted line), CM2-HIS (blue dotted line), CESM-CDA (green solid line), CM2-CDA (blue solid line), and the observed product (red solid line).



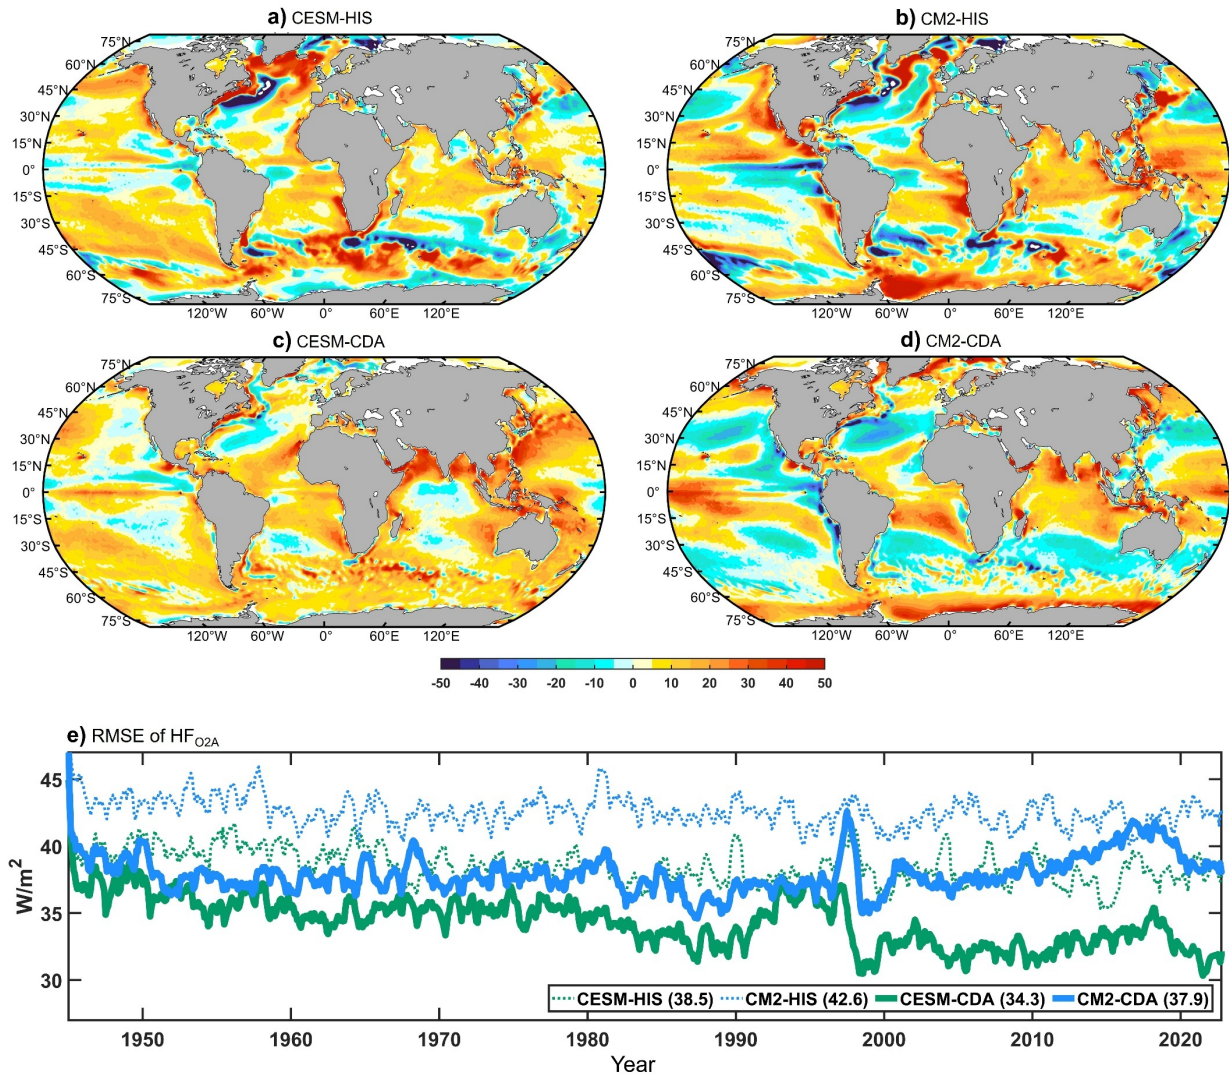

**Fig. S3 | Convergent oceanic heat flux to the atmosphere (HF<sub>O2A</sub>) in coupled data assimilation (CDA) estimates. a–d) Error distributions of HF<sub>O2A</sub> in CESM-HIS, CM2-HIS, CESM-CDA, and CM2-CDA, respectively, verified against ERA5. e) Time series of HF<sub>O2A</sub> root-mean-square error (RMSE) against ERA5 in CESM-HIS (green dotted line), CM2-HIS (blue dotted line), CESM-CDA (green solid line), and CM2-CDA (blue solid line) (unit: W/m<sup>2</sup>). The average value for each line is indicated in the figure key.**

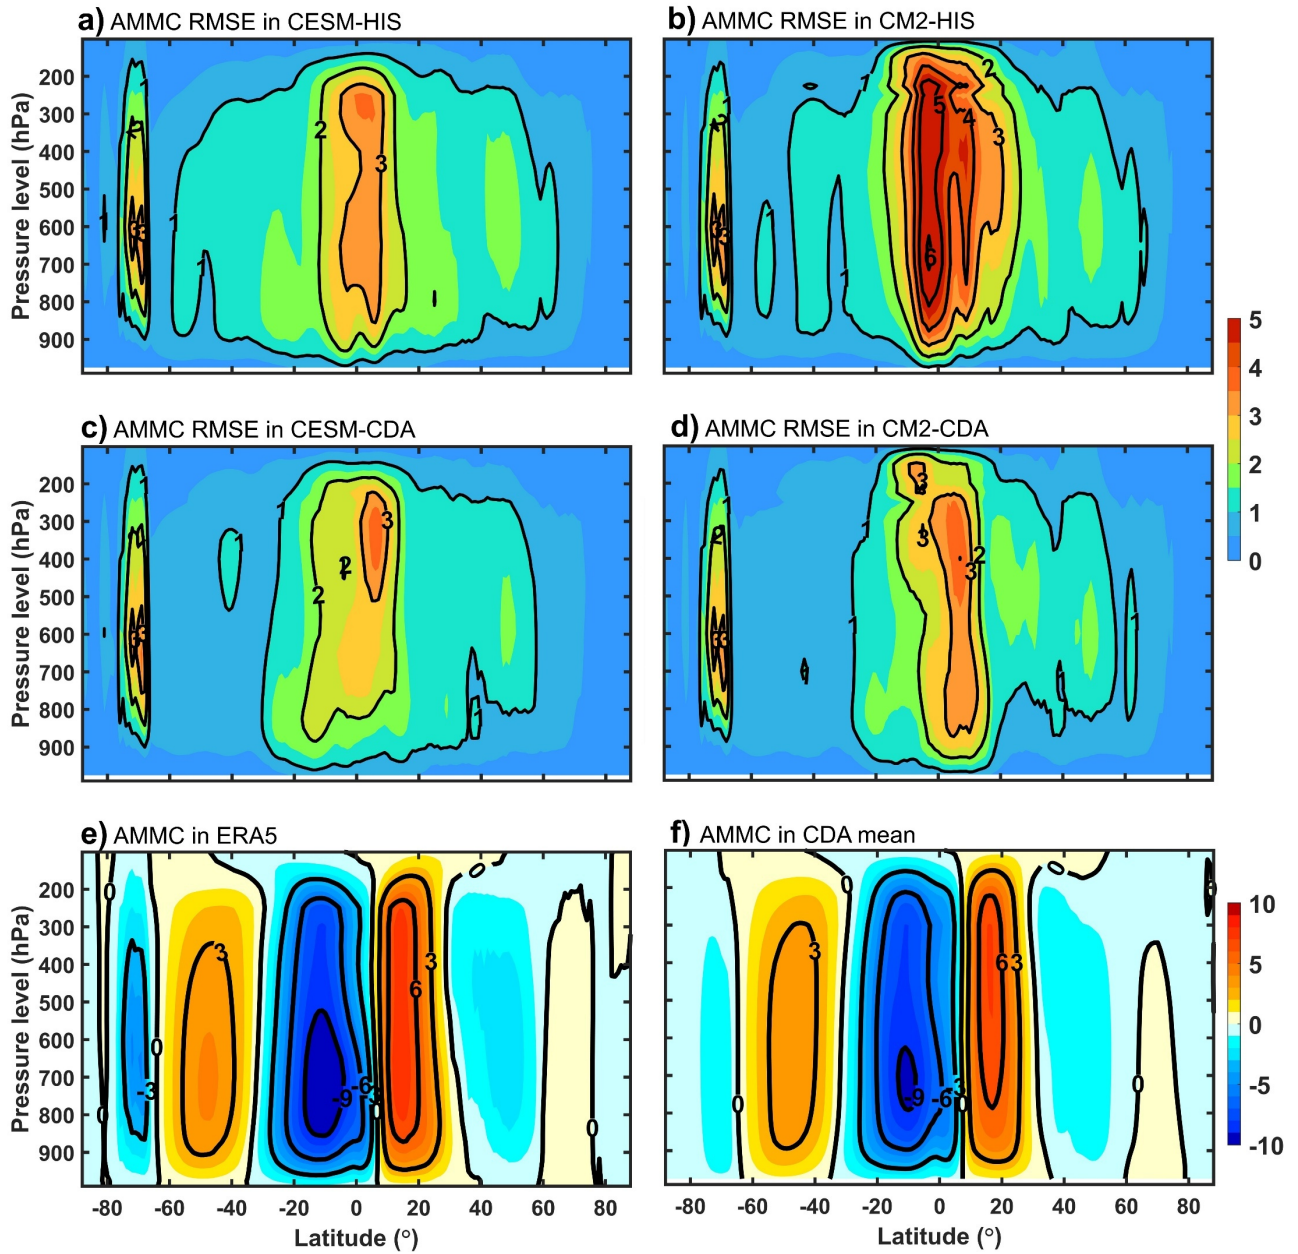

**Fig. S4 | Convergent atmospheric mean meridional circulation (AMMC) mean state in coupled data assimilation (CDA) estimates. a–d) Root-mean-square error (RMSE) distributions of AMMC for the model simulations CESM-HIS and CM2-HIS, and the CDA results CESM-CDA and CM2-CDA, verified against ERA5. e–f) Mean states of AMMC in ERA5 and CDA mean, respectively (unit:  $10^{10}$  kg/s).**

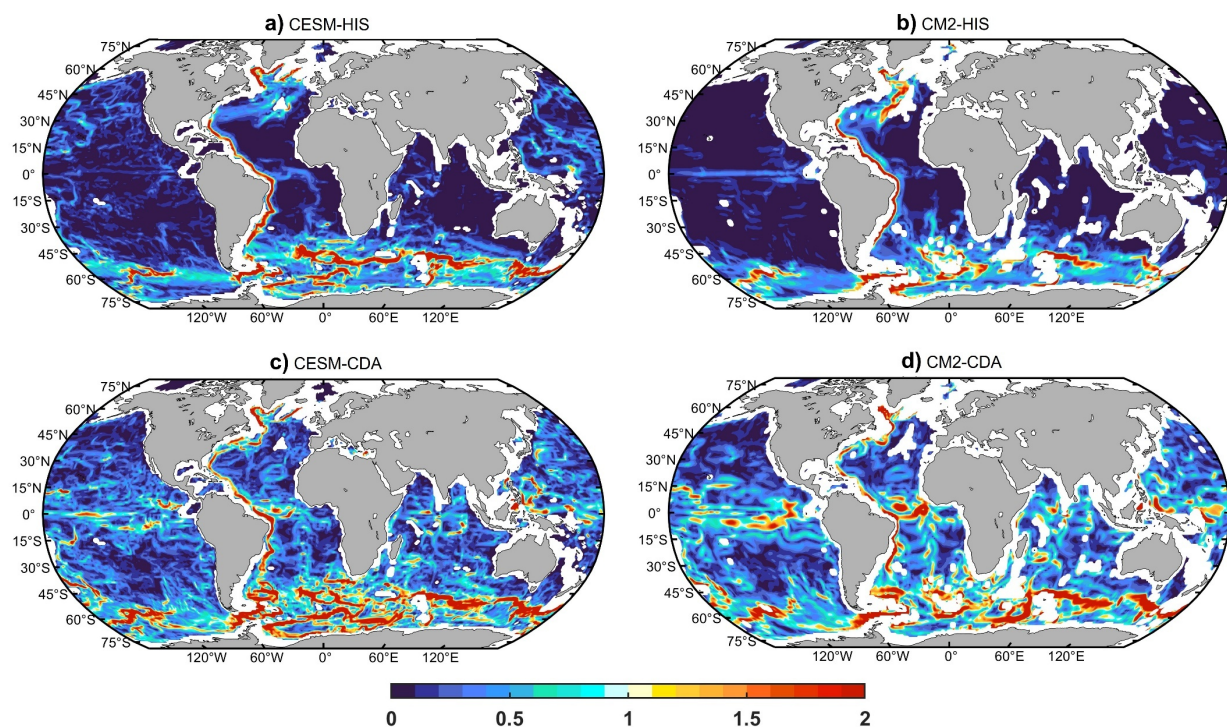

458  
 459 **Fig. S5 | Convergent deep-ocean current velocities in coupled data assimilation (CDA) estimates. a–d)**  
 460 Temporal mean distributions of 2500–5000 m ocean current velocities (unit: cm/s) in CESM-HIS, CM2-HIS,  
 461 CESM-CDA, and CM2-CDA, respectively.



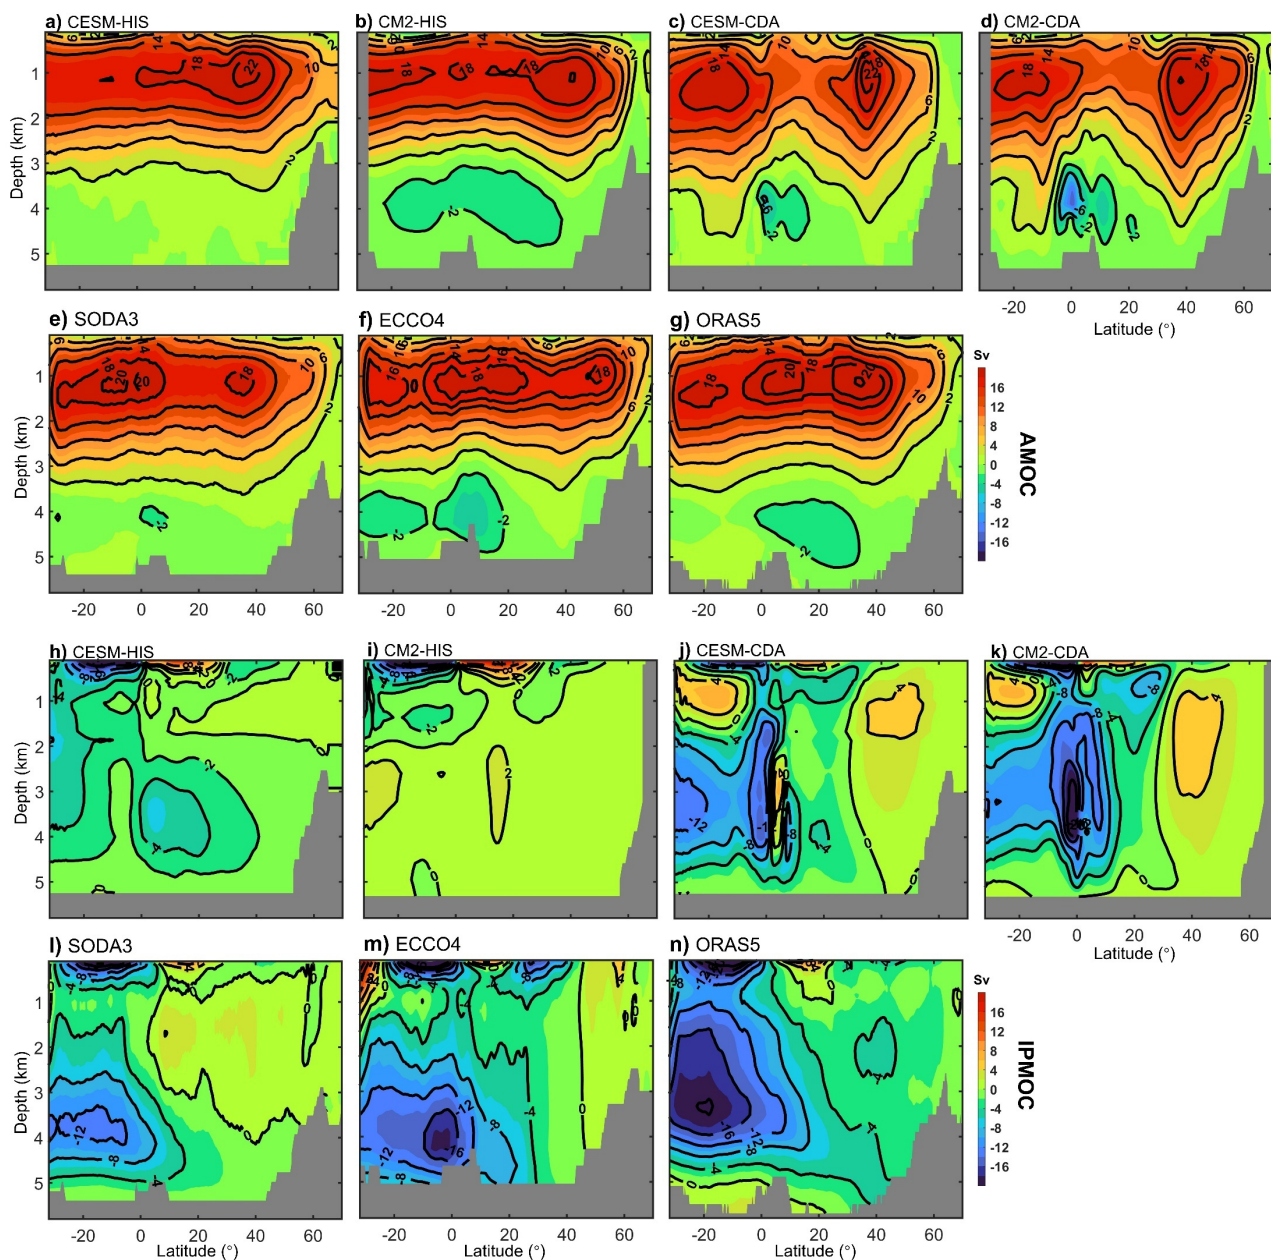

**Fig. S6 | Convergent Atlantic and Indo-Pacific meridional overturning circulations (AMOC and IPMOC) in coupled data assimilation (CDA) estimates. a–g) Temporal mean AMOC (unit: Sv) in CESM-HIS, CM2-HIS, CESM-CDA, CM2-CDA, SODA3, ECCO4, and ORAS5, respectively. h–n) Same as a–g) but for IPMOC.**

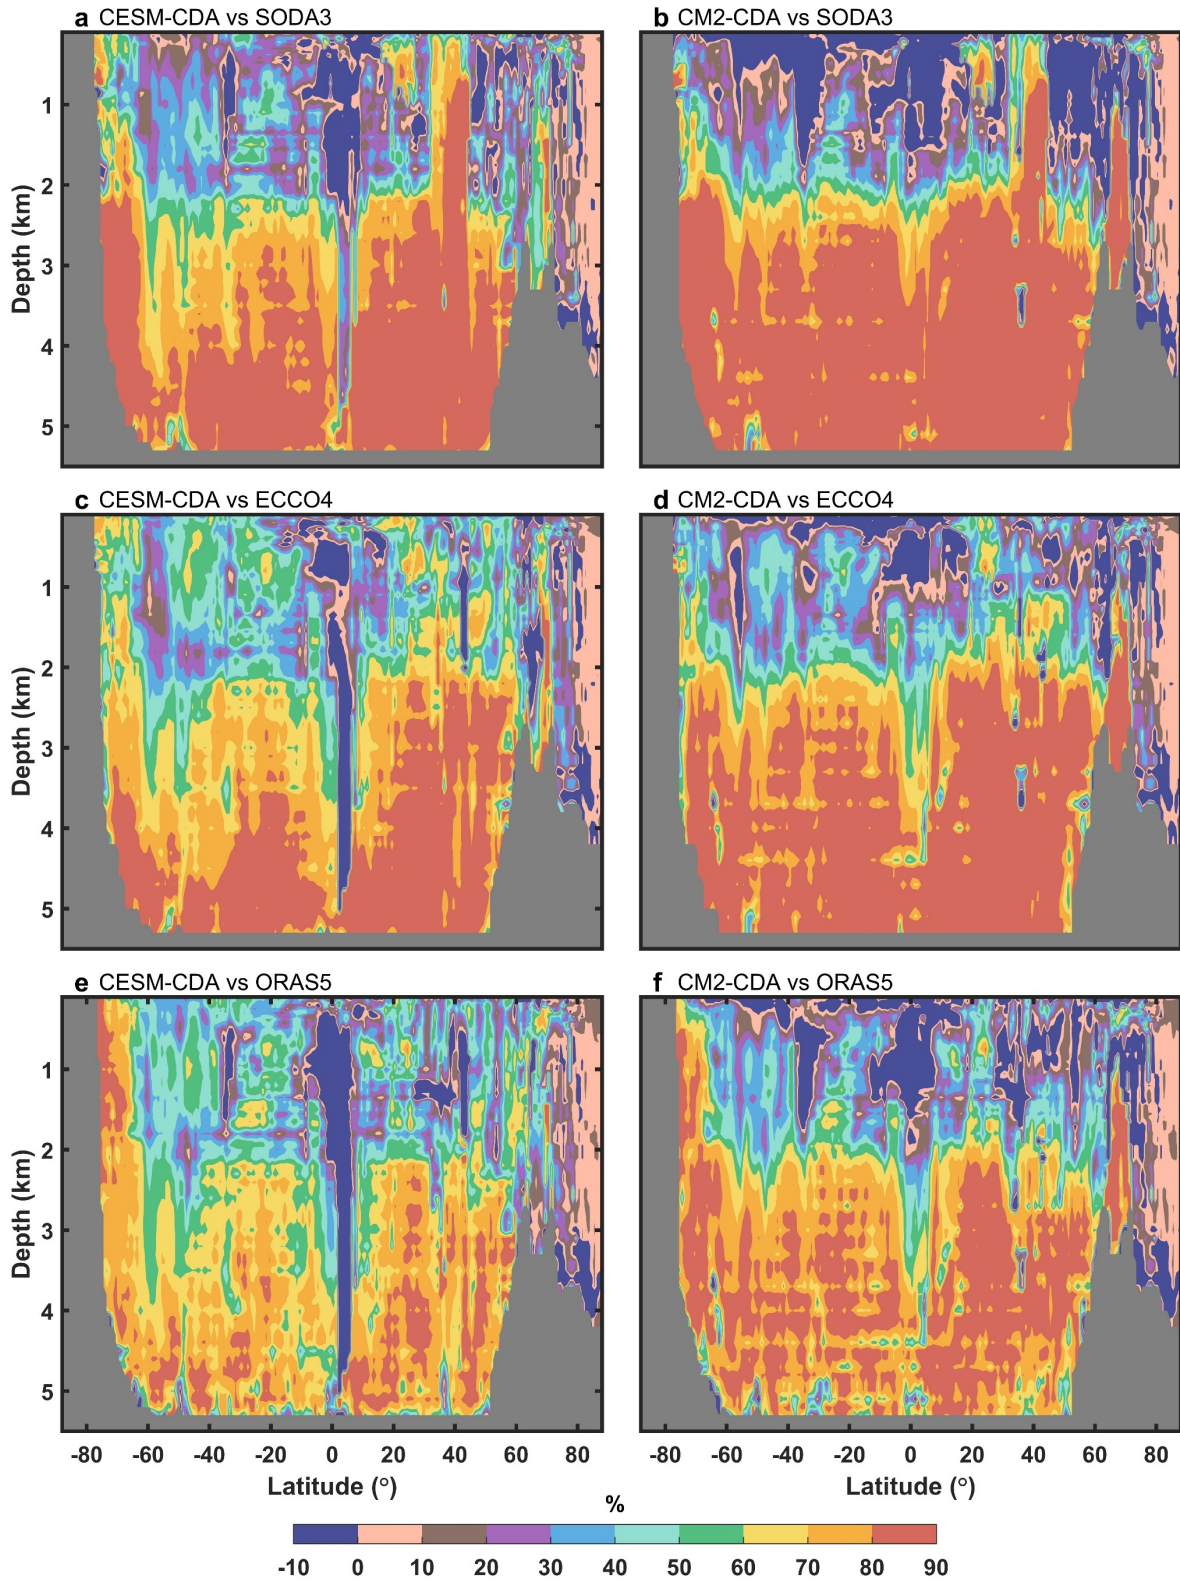

466  
 467 **Fig. S7 | Coherent ocean stratification in coupled data assimilation (CDA) estimates. a–f)** Latitudinal  
 468 distributions of root-mean-square error (RMSE) reduction rates (unit: %) for potential density compared with **a–b)**  
 469 SODA3, **c–d)** ECCO4, and **e–f)** ORAS5 in CESM-CDA (left panels) and CM2-CDA (right panels), verified against  
 470 the WOA18.



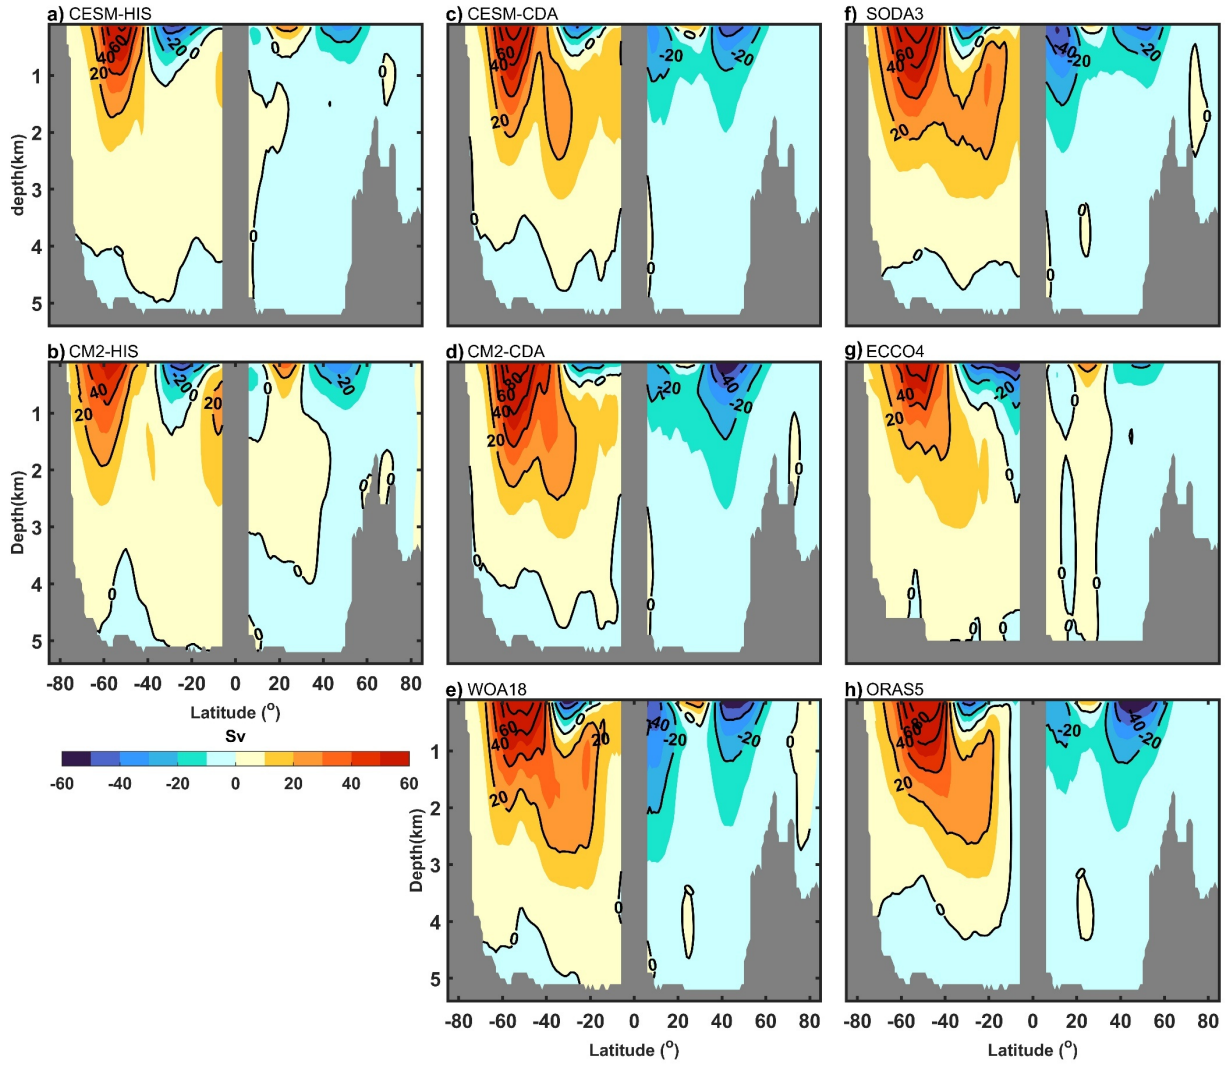

**Fig. S8 | Geostrophic global meridional overturning circulation (GMOC) mean states of model simulations and assimilation products. a–h) Geostrophic GMOC mean states in CESM-HIS, CM2-HIS, CESM-CDA, CM2-CDA, WOA18, SODA3, ECCO4, and ORAS5, respectively.**

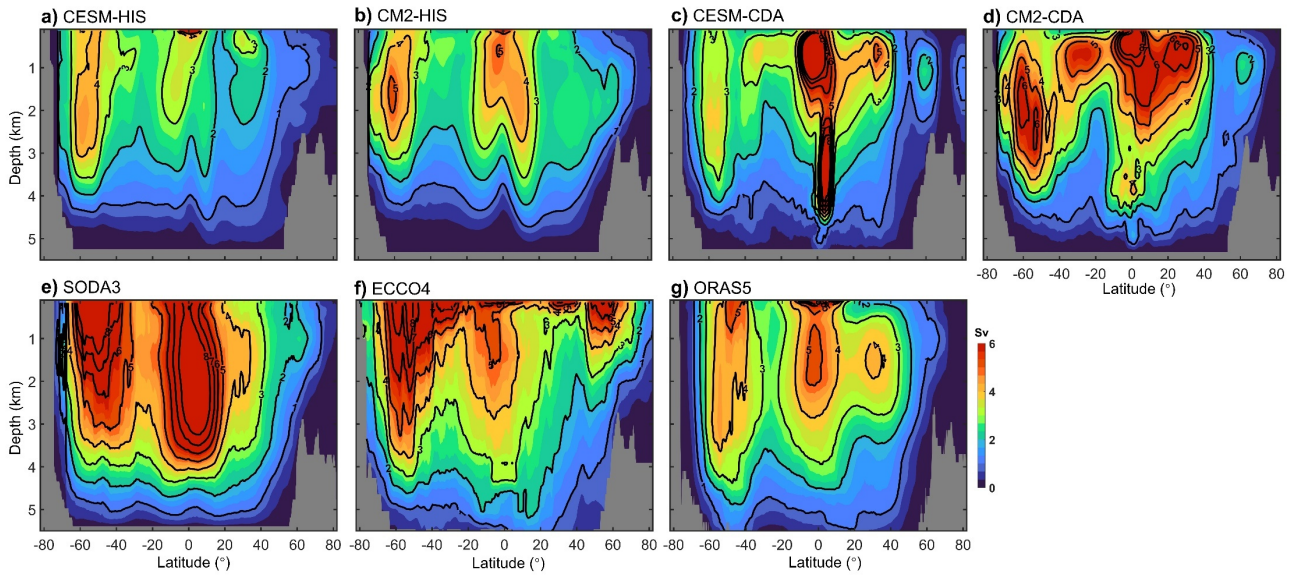

**Fig. S9 | Distributions of global meridional overturning circulation (GMOC) standard deviations in model simulations and assimilation products. a–g) Standard deviations of GMOC stream functions (unit: Sv) in CESM-HIS, CM2-HIS, CESM-CDA, CM2-CDA, SODA3, ECCO4, and ORAS5, respectively.**

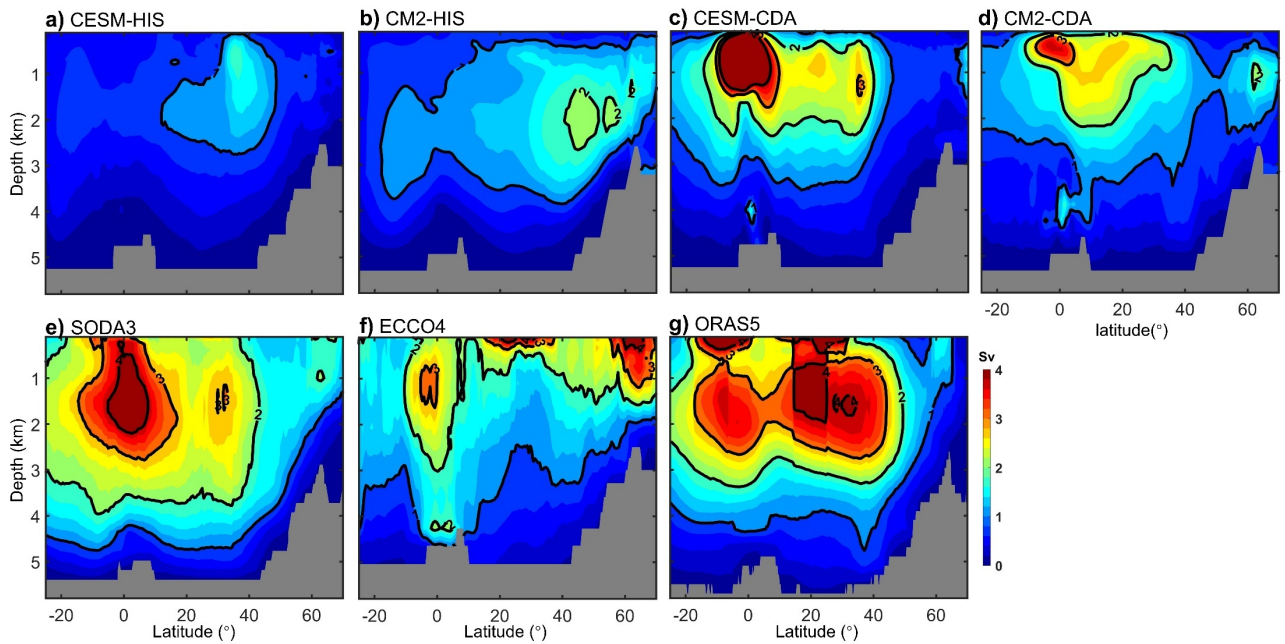

**Fig. S10 | Same as Fig. S9 but for Atlantic meridional overturning circulation (AMOC).**

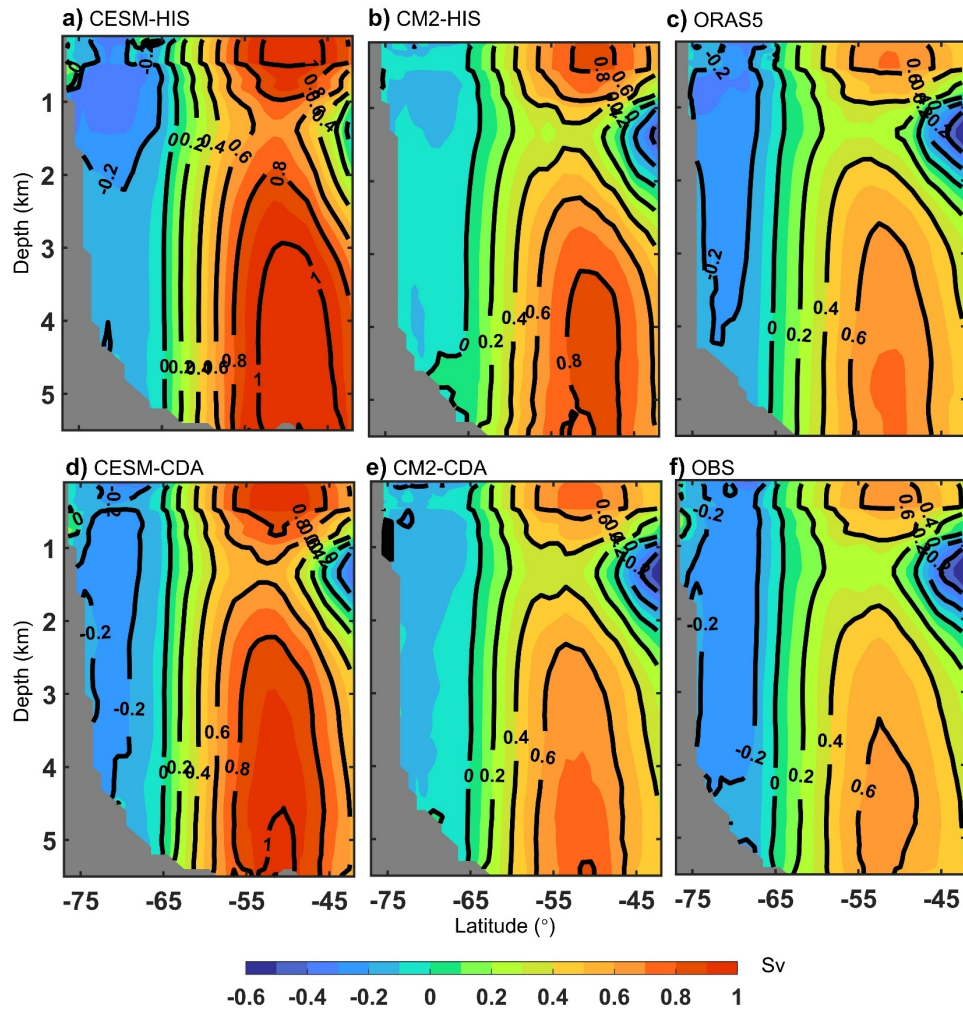

482

483 **Fig. S11 | Coupled data assimilation (CDA)-estimated Antarctic Circumpolar Current residual circulation**  
 484 **(ACC-RC). a–f) Mean states of ACC-RC stream functions for a) CESM-HIS, b) CM2-HIS, c) ORAS5, d) CESM-**  
 485 **CDA, e) CM2-CDA, and f) observational result (calculated from EN4 and ERA5).**



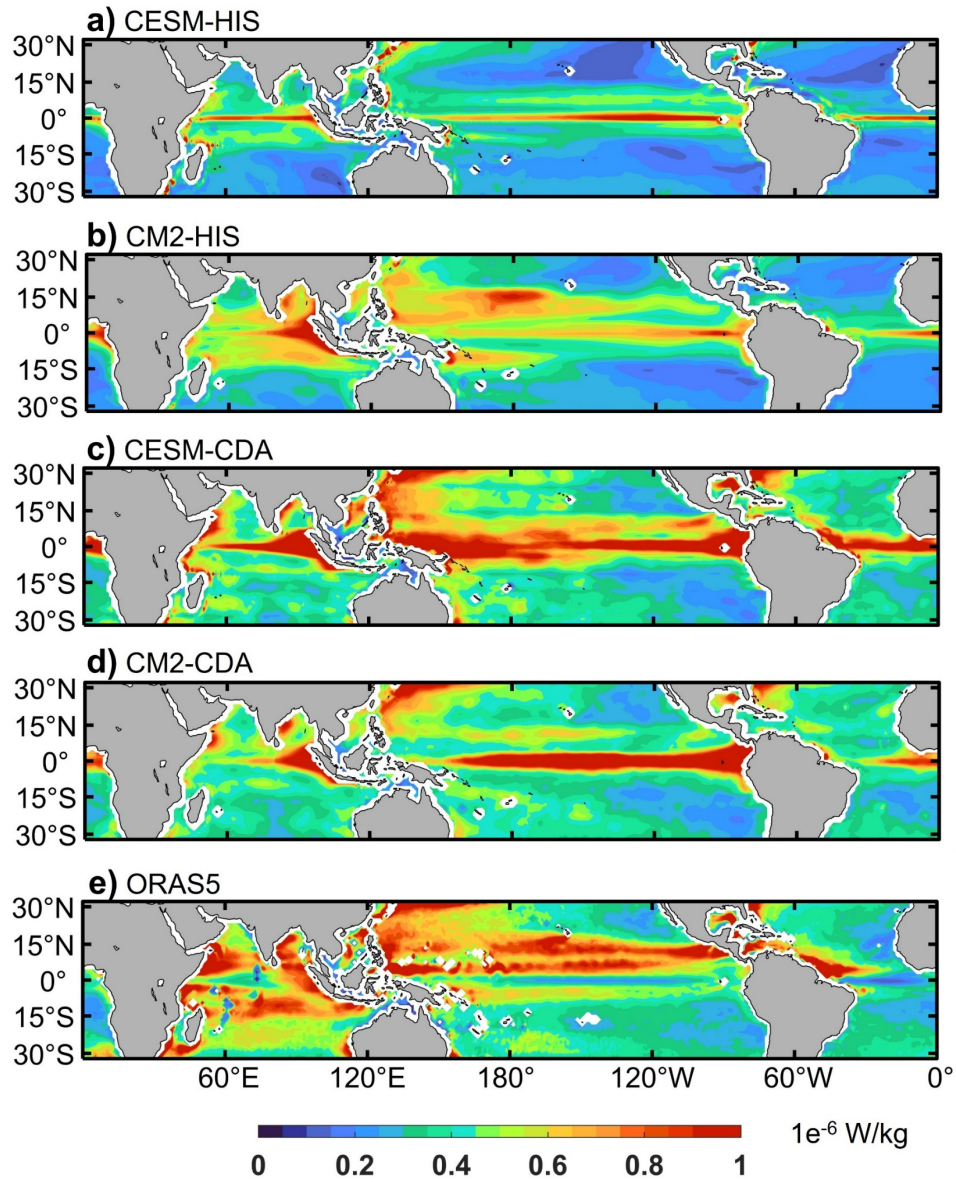

**Fig. S12 | Coupled data assimilation (CDA)-estimated tropical diffusive mixing. a–e,** Temporal mean distributions of tropical (30° S–30° N) kinetic energy dissipation rate  $[\epsilon_m]$  (unit:  $10^{-6}$  W/kg) in **a)** CESM-HIS, **b)** CM2-HIS, **c)** CESM-CDA, **d)** CM2-CDA, and **e)** ORAS5 ocean reanalysis.

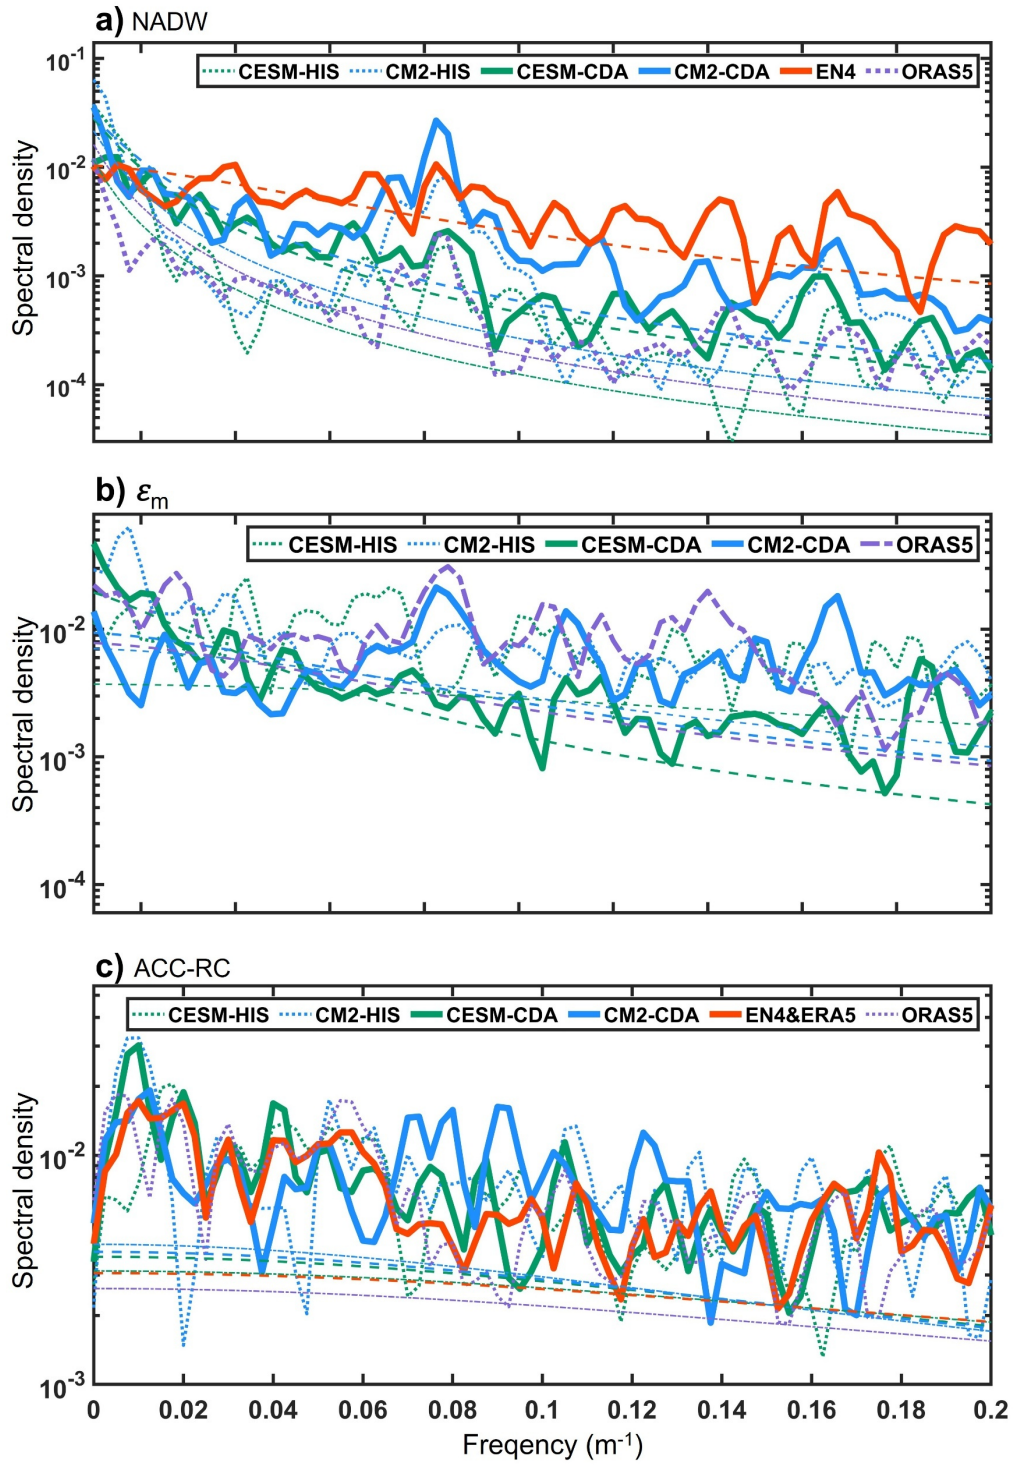

**Fig. S13** | Spectrogram of **a)** North Atlantic Deep Water (NADW), **b)** tropical diffusive mixing ( $\varepsilon_m$ ), and **c)** Antarctic Circumpolar Current residual circulation (ACC-RC).

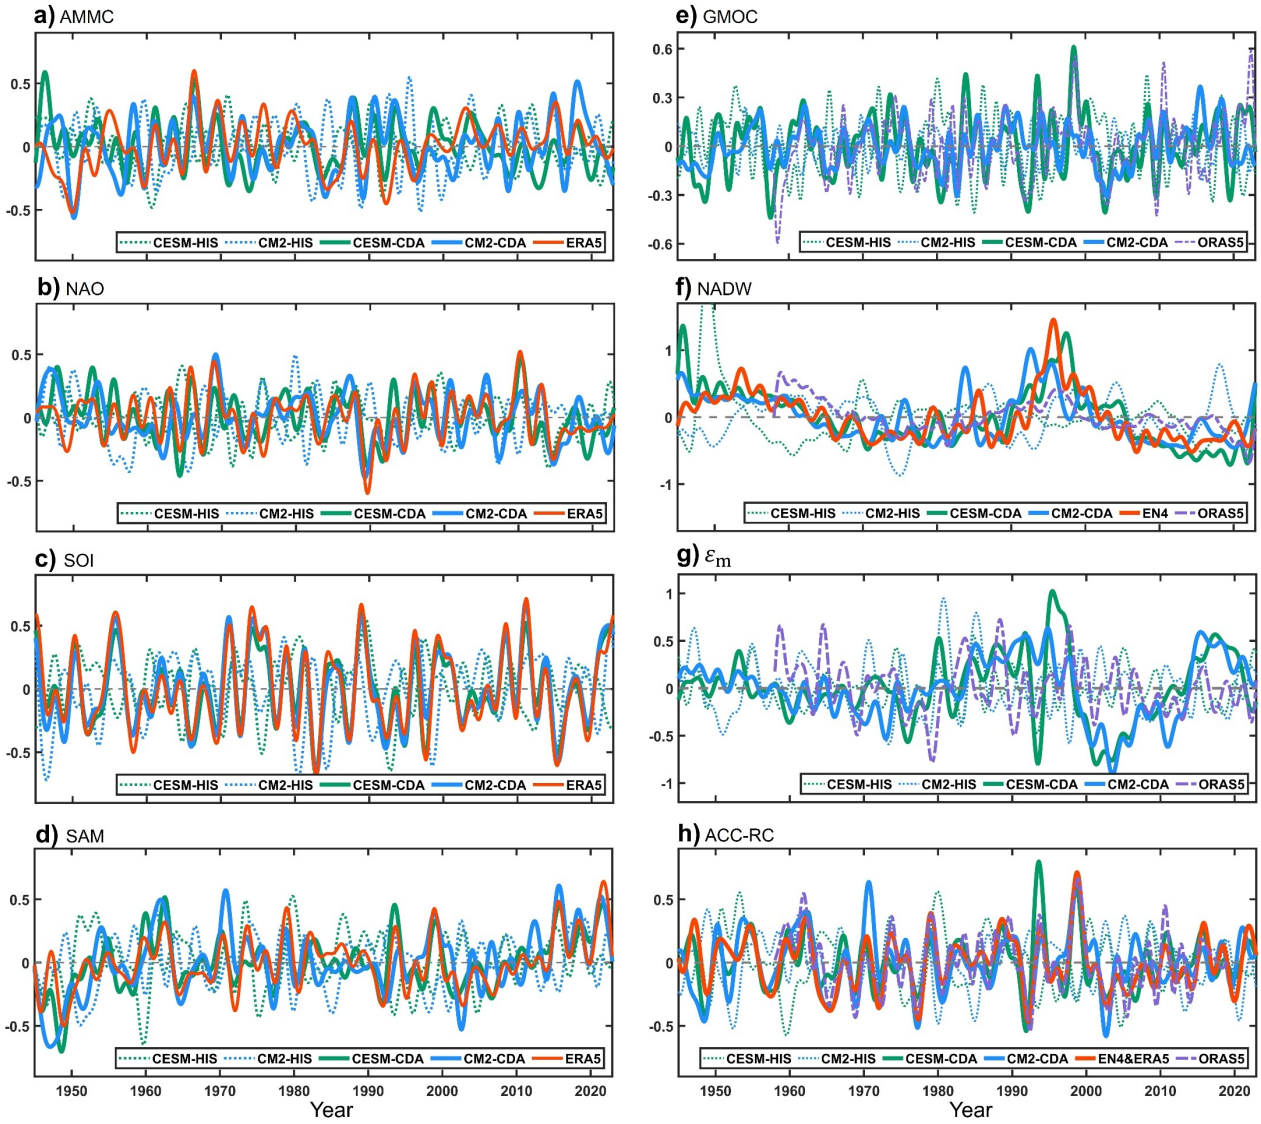

**Fig. S14 | Convergent variability of various components of atmospheric mean meridional circulation (AMMC) and global meridional overturning circulation (GMOC) in coupled data assimilation (CDA) estimates. a–d)** The normalized 1–20-yr band-pass filtered time series of a) AMMC, b) North Atlantic oscillation (NAO), c) Southern Oscillation Index (SOI), and d) Southern Annular Mode (SAM) indices, respectively. **e–h)** The normalized 1–20-yr band-pass filtered time series of e) GMOC, f) North Atlantic Deep Water (NADW), g) tropical diffusive mixing ( $\epsilon_m$ ), and h) Antarctic Circumpolar Current residual circulation (ACC-RC), respectively.



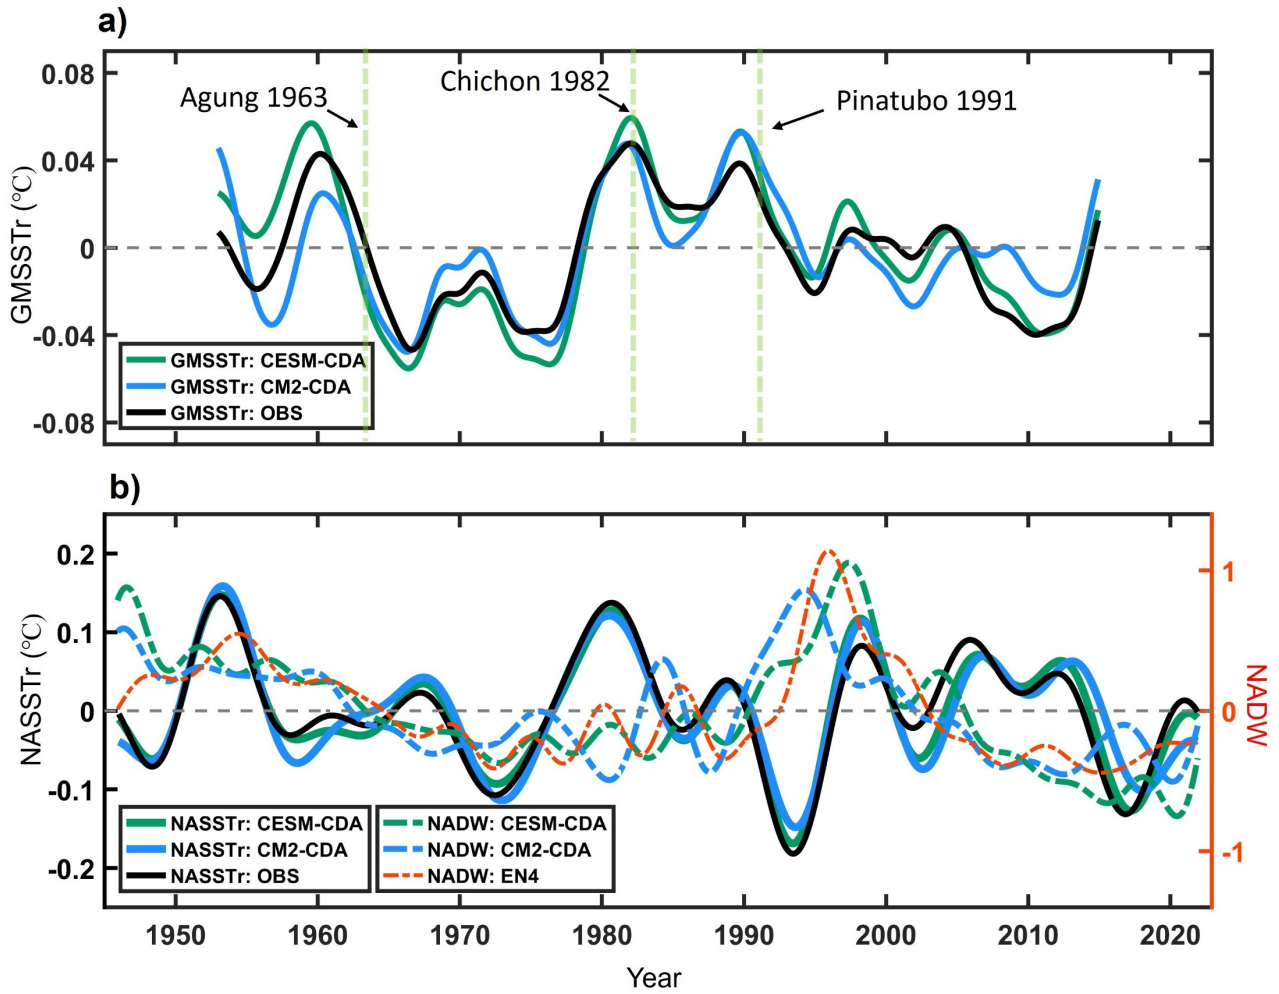

**Fig. S15 | Decadal variability of global and North Atlantic mean sea surface temperature (SST) anomaly residual (GMSSTr and NASSTr) and North Atlantic Deep Water (NADW) in coupled data assimilation (CDA) estimates.** **a)** Time series of GMSSTr for CDA estimates CESM-CDA (green-solid) and CM2-CDA (blue-solid) as well as observation (OBS, black-solid) (°C). The GMSSTr is obtained by removing the quadratic fit from the GASST (computed from 8-year low-passed SST). The GMSST is defined as area-weighted mean SST between 40°S and 60°N and anomalies are relative to the 1980–2010 mean [43]. **b)** Time series of 5–20-yr band-pass filtering NASSTr for observation (black-solid, °C) and 2–20-yr band-pass filtering normalized NADW for CESM-CDA (green-dash) and CM2-CDA (blue-dash). The NASSTr is obtained by removing the quadratic fit from the NASST, which is computed from 1-year low-passed SSTA over the area of 55°–35° W and 45°–65° N.

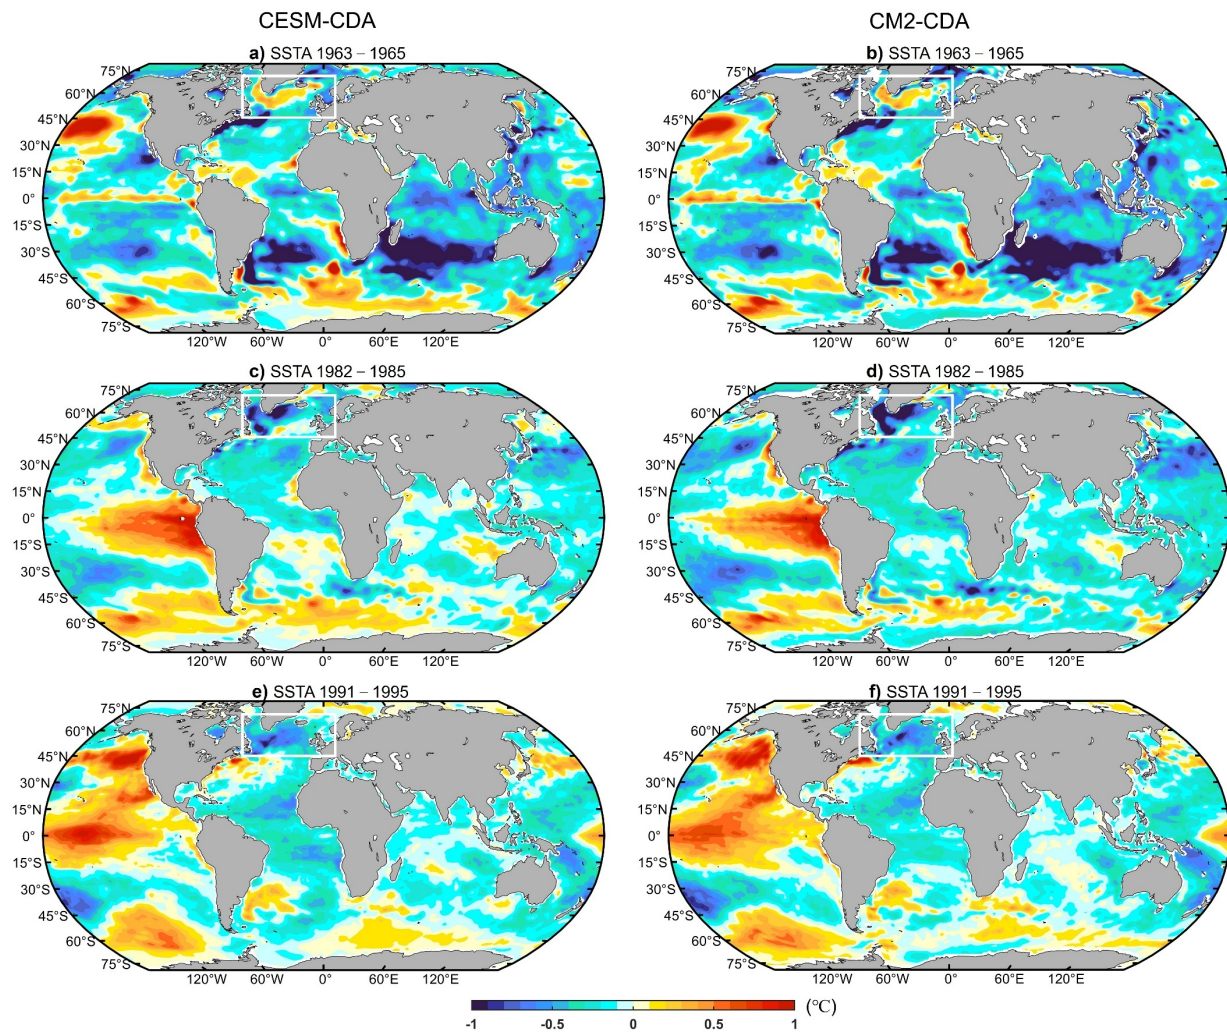

510

511 **Fig. S16 | Temperature response after major volcanic events. a–b)** Distribution of sea surface temperature (SST)  
 512 anomaly (SSTA) during the period of 1963–1966 for **a)** CESM-CDA and **b)** CM2-CDA. **c–d)** Same as **a–b)** but for  
 513 period 1982–1985. **e–f)** Same as **a–b)** but for period 1991–1995.

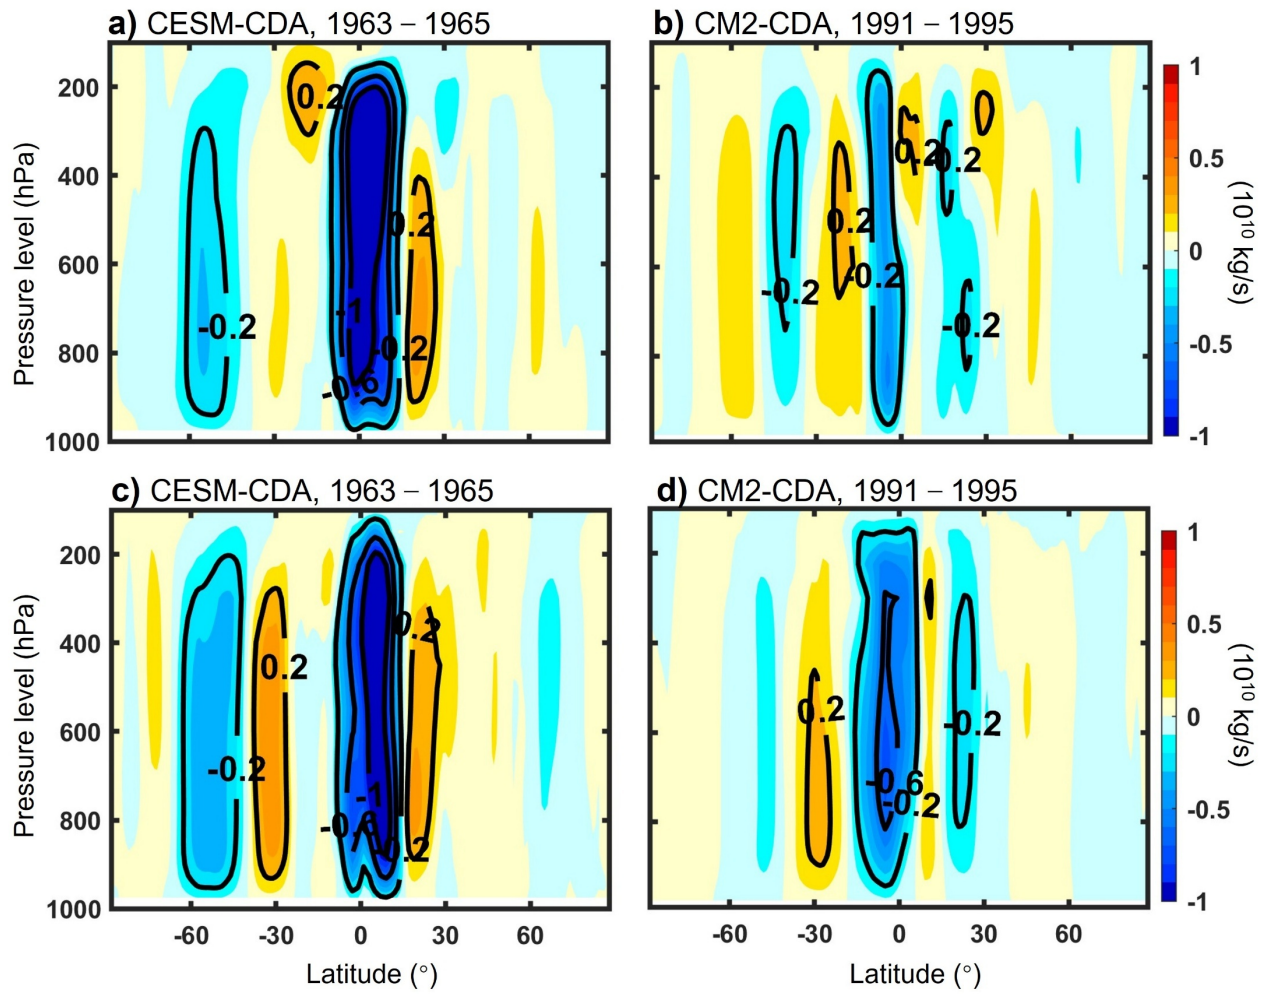

514  
 515 **Fig. S17** | Atmospheric meridional mean meridional circulation (AMMC) anomaly distributions during (left panels)  
 516 1963–1965 and (right panels) 1991–1995 for **a–b)** CESM-CDA and **c–d)** CM2-CDA.

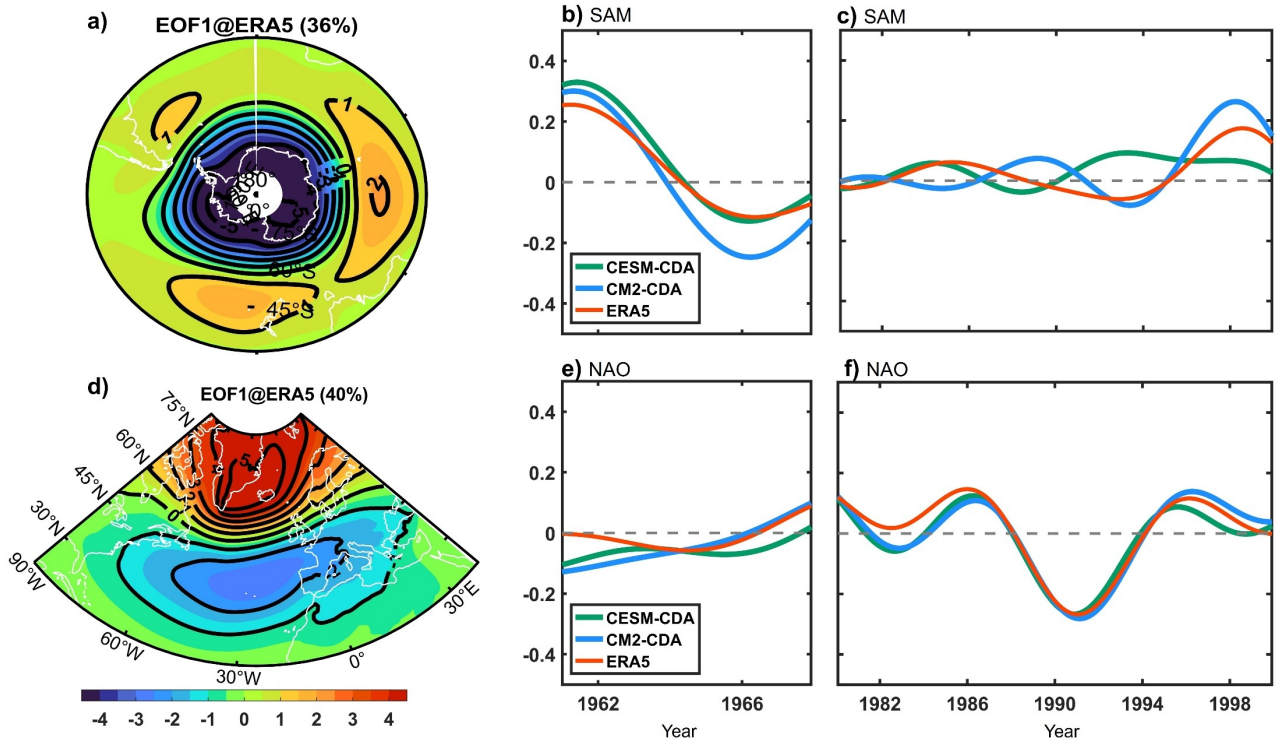

**Fig. S18** | **a)** The leading Empirical Orthogonal Function (EOF) of sea level pressure (SLP) anomalies over the Southern Ocean. **b–c)** Time series of 5–20-yr band-pass filtering Southern Annular Mode (SAM) during periods of **b)** Mt. Agung (1963), **c)** Mt. Chichon (1982) and Mt. Pinatubo (1991) volcanic eruptions. **d–f)** Same as **a–c)** but for the Atlantic and the North Atlantic Oscillation (NAO).



**Table S1.** List of acronyms.

| Acronym   | Full name                                                                                                                                                                                                                                                                                                                                                                                                                                         | Description/Definition/Role in this study                                                                                                   |
|-----------|---------------------------------------------------------------------------------------------------------------------------------------------------------------------------------------------------------------------------------------------------------------------------------------------------------------------------------------------------------------------------------------------------------------------------------------------------|---------------------------------------------------------------------------------------------------------------------------------------------|
| ACC       | Antarctic Circumpolar Current                                                                                                                                                                                                                                                                                                                                                                                                                     | An ocean circulation system around the Antarctic                                                                                            |
| ACC-RC    | Residual circulation of the Antarctic Circumpolar Current system                                                                                                                                                                                                                                                                                                                                                                                  | A circulation to reflect the balance between direct Ekman effects and counteracting influences of eddy-induced transport in ACC.            |
| AM2.1     | Atmosphere Model version 2.1                                                                                                                                                                                                                                                                                                                                                                                                                      | Atmospheric component model of CM2                                                                                                          |
| AMMC      | Atmospheric mean meridional circulation                                                                                                                                                                                                                                                                                                                                                                                                           | The atmospheric vertical circulation in y-z plane                                                                                           |
| AMOC      | Atlantic meridional overturning circulation                                                                                                                                                                                                                                                                                                                                                                                                       | An important branch of ocean meridional overturning circulation in the Atlantic                                                             |
| Argo      | Array for real-time geostrophic oceanography                                                                                                                                                                                                                                                                                                                                                                                                      | An international program that deploys a global array of free-floating profiling floats to measure upper 2000 ocean temperature and salinity |
| CAM5      | Community Atmosphere Model version 5                                                                                                                                                                                                                                                                                                                                                                                                              | Atmospheric component of CESM                                                                                                               |
| CDA       | Coupled data assimilation                                                                                                                                                                                                                                                                                                                                                                                                                         | A data constraint approach using coupled models                                                                                             |
| CESM      | Community Earth System Model developed at the National Center for Atmospheric Research                                                                                                                                                                                                                                                                                                                                                            | One of coupled models used in this study as assimilation model                                                                              |
| CESM-CDA  | CDA system/experiment using CESM                                                                                                                                                                                                                                                                                                                                                                                                                  | CDA system/experiment by applying multiscale CDA algorithm to CESM                                                                          |
| CESM-CDA0 | The formal version of CDA experiment using CESM                                                                                                                                                                                                                                                                                                                                                                                                   | Experiment evaluated in Jiang et al. (2024)                                                                                                 |
| CESM-HIS  | Historical simulation experiment of CESM                                                                                                                                                                                                                                                                                                                                                                                                          | CESM control run without data assimilation                                                                                                  |
| CICE4     | Community Ice Code version 4                                                                                                                                                                                                                                                                                                                                                                                                                      | An ice component model of CESM                                                                                                              |
| CLM4      | Community Land Model version 4                                                                                                                                                                                                                                                                                                                                                                                                                    | A land component model of CESM                                                                                                              |
| CM2       | The second generation of Coupled Climate Model developed at the Geophysical Fluid Dynamics Laboratory                                                                                                                                                                                                                                                                                                                                             | One of coupled models used in this study as assimilation model                                                                              |
| CM2-CDA   | CDA system/experiment using CM2                                                                                                                                                                                                                                                                                                                                                                                                                   | CDA system/experiment by applying multiscale CDA algorithm to CM2                                                                           |
| CM2-CDA0  | The formal version of CDA experiment using CM2                                                                                                                                                                                                                                                                                                                                                                                                    | Experiment evaluated in Jiang et al. (2024)                                                                                                 |
| CM2-HIS   | Historical simulation experiment of CM2                                                                                                                                                                                                                                                                                                                                                                                                           | CM2 control run without data assimilation                                                                                                   |
| ECCO4     | Estimating the Circulation and Climate of the Ocean version 4 release 3                                                                                                                                                                                                                                                                                                                                                                           | One of 3 ocean reanalysis products used in this study as references                                                                         |
| EN4       | Version 4 of global ocean objective analysis dataset of observations combining from two European Union projects: ENACT (Enhanced Ocean Data Assimilation and Climate Prediction; <a href="http://www.ecmwf.int/research/EU_projects/ENACT/index.html">http://www.ecmwf.int/research/EU_projects/ENACT/index.html</a> ) and ENSEMBLES ( <a href="http://ensembles-eu.metoffice.com/index.html">http://ensembles-eu.metoffice.com/index.html</a> ). | The subsurface temperature and salinity observation dataset used in this study to evaluate CDA results                                      |
| EOF       | Empirical Orthogonal Function                                                                                                                                                                                                                                                                                                                                                                                                                     | An analysis method; Each EOF represents a spatial pattern.                                                                                  |
| ECMWF     | European Centre for Medium-Range Weather Forecasts                                                                                                                                                                                                                                                                                                                                                                                                | An institution on numerical weather and climate prediction                                                                                  |
| ERA5      | The fifth-generation ECMWF reanalysis starting from 1940                                                                                                                                                                                                                                                                                                                                                                                          | Atmospheric reanalysis products used for CDA's atmosphere "observation" and validation in this study                                        |

|                   |                                                                             |                                                                                                                                                            |
|-------------------|-----------------------------------------------------------------------------|------------------------------------------------------------------------------------------------------------------------------------------------------------|
| ERSSTv5           | Extended Reconstructed SST version 5                                        | SST observation product used to evaluate GMSSTr and NASSTr                                                                                                 |
| GFDL              | Geophysical Fluid Dynamics Laboratory                                       | The institution of NOAA, who developed the CM2 model                                                                                                       |
| GMOC              | Global ocean meridional overturning circulation                             | The main theme in this study                                                                                                                               |
| MOC <sup>n</sup>  | The northern component of GMOC                                              | The first Principal Component (PC1) of GMOC stream functions over the region north of 30°S                                                                 |
| MOC <sup>s</sup>  | The southern component of GMOC                                              | The PC1 of GMOC stream functions over the region south of 30°S                                                                                             |
| MOC <sup>t</sup>  | The tropical component of GMOC                                              | The PC1 of GMOC stream functions over the region 30° S–30° N                                                                                               |
| GMSST             | Global mean SST                                                             | An index of observed global mean SST                                                                                                                       |
| GMSSTr            | Global mean SST residual                                                    | An index used to show the responses of observed SST on major volcanic eruptions                                                                            |
| HadISST           | Hadley Centre Sea Ice and Sea Surface Temperature Dataset                   | SST observation product used for CDA in this study                                                                                                         |
| HF <sub>O2A</sub> | Oceanic heat flux to the atmosphere                                         | Feedback of the ocean to the atmosphere                                                                                                                    |
| IPCC              | Intergovernmental Panel on Climate Change                                   | An international organization created in response to the growing concern about human-induced climate change                                                |
| IPMOC             | Indo-Pacific meridional overturning circulation                             | The stream function of ocean meridional overturning circulation for the Indian Ocean and Pacific Ocean                                                     |
| LM2.1             | Land Model version 2.1                                                      | A land component model of CM2                                                                                                                              |
| MOM4              | Modular Ocean Model version 4                                               | An ocean component model of CM2                                                                                                                            |
| MOVE              | Meridional Overturning Variability Experiment                               | Volume transport data mooring observations at 16° N in the western Atlantic                                                                                |
| NADW              | North Atlantic Deep Water                                                   | The NADW index is defined as the average thickness between two isopycnals of $\sigma_{1.5}$ over the North Atlantic, see <b>Materials and Methods b3</b> . |
| NAO               | North Atlantic Oscillation                                                  | A time series of the leading EOF of SLP anomalies over the Atlantic sector, 20°–80° N, 90° W–40° E                                                         |
| NAOC              | The North Atlantic Changes                                                  | Volume transport data mooring observations at 47° N in the western Atlantic                                                                                |
| NASSTr            | North Atlantic SST residual                                                 | An index used to show the responses of observed SST over Northern Atlantic on major volcanic eruptions                                                     |
| NCAR              | National Center for Atmospheric Research                                    | The institution develops CESM model                                                                                                                        |
| NH                | Northern Hemisphere                                                         | One half of the Earth in north of the equator                                                                                                              |
| NOAA              | National Oceanic and Atmospheric Administration                             | An agent of US federal government                                                                                                                          |
| OISST             | Optimum Interpolation Sea Surface Temperature Dataset                       | SST observation product used for CDA in this study                                                                                                         |
| ORAS5             | Ocean Reanalysis System 5                                                   | Ocean reanalysis product as reference in this study                                                                                                        |
| PC                | Principal component, referred as PC1 (first), PC2 (second) etc.             | The temporal evolution associated with each EOF                                                                                                            |
| POP2              | Parallel Ocean Program version 2                                            | An ocean model component of CESM                                                                                                                           |
| Ps                | Surface pressure                                                            | A basic variable of atmosphere state                                                                                                                       |
| RAPID             | Rapid Climate Change: Meridional Overturning Circulation and Heatflux Array | A collaborative research project for measuring transport at 26.5°N in the Atlantic                                                                         |

|                  |                                                       |                                                                                                                             |
|------------------|-------------------------------------------------------|-----------------------------------------------------------------------------------------------------------------------------|
| RCP45            | Representative Concentration Pathway 4.5              | A medium-emission scenario, in which the radiative forcing level stabilizes at around 4.5 W/m <sup>2</sup> by 2100.         |
| RMSE             | Root mean square error                                | A measure of quantifying the differences between the estimated values and actual observed values                            |
| SAM              | Southern Annular Mode                                 | The principal mode of variability in the SH extra-tropics, describing ~30% of SH variability                                |
| SH               | Southern Hemisphere                                   | One half of the Earth in south of the equator                                                                               |
| SLP              | Sea level pressure                                    | A basic variable of atmosphere state                                                                                        |
| SODA3            | Simple Ocean Data Assimilation version 3.4.2          | Ocean reanalysis product as reference in this study                                                                         |
| SOI              | Southern Oscillation Index                            | An index used to characterize the large scale SLP patterns in the tropical Pacific                                          |
| SST              | Sea Surface Temperature                               | A basic variable of ocean state                                                                                             |
| STD              | Standard deviation                                    | The dispersion of data relative to the mean                                                                                 |
| W <sub>A20</sub> | Atmospheric work exerted on the ocean                 | An important variable in atmosphere-ocean coupling process                                                                  |
| WBCs             | West boundary currents                                | An important ocean currents system                                                                                          |
| WOA              | World Ocean Atlas                                     | Ocean temperature and salinity observational climatology used for deep ocean restoring in CDA and validation of CDA results |
| $\varepsilon_m$  | Kinetic energy dissipation rate                       | The diagnosed tropical diffusive mixing effects                                                                             |
| $\sigma_{1.5}$   | The potential density referenced to a depth of 1500 m | The isopycnals used to define NADW                                                                                          |

**Table S2.** Description of reanalysis experiments.

| Experiment      | Model information                                                                                                            | Data constraint                                                                                                                                                                                                                                 | Period           |
|-----------------|------------------------------------------------------------------------------------------------------------------------------|-------------------------------------------------------------------------------------------------------------------------------------------------------------------------------------------------------------------------------------------------|------------------|
| <b>CESM-HIS</b> |                                                                                                                              | 1945–2006: historical radiative forcing<br>2007–present: RCP45 scenario                                                                                                                                                                         | 1945–<br>present |
| <b>CESM-CDA</b> | <b>NCAR-CESM1.3</b><br>Atmospheric component:<br>CAM5<br>1° × 1°, 26 layers<br>Oceanic component: POP2<br>1° × 1°, 60 layers | Gridded surface pressure (Ps) from ERA5,<br>gridded SST from HadISST and OISST,<br>in-situ temperature and salinity profiles,<br>restoring to World Ocean Atlas 2018<br>(WOA18) in deep ocean<br><br>Radiative forcing is the same as CESM-HIS. |                  |
| <b>CM2-HIS</b>  | <b>GFDL-CM2.1</b><br>Atmospheric component:<br>AM2.1<br>2° × 2.5°, 24 layers                                                 | Same as CESM-HIS                                                                                                                                                                                                                                |                  |
| <b>CM2-CDA</b>  | Oceanic component: MOM4<br>1° × 1°, 50 layers                                                                                | Same as CESM-CDA                                                                                                                                                                                                                                |                  |

529

**Table S3.** Information of reanalysis products.

| Reanalysis       | Ocean model                                                        | Resolution                                      | Forcing     | Period           |
|------------------|--------------------------------------------------------------------|-------------------------------------------------|-------------|------------------|
| <b>SODA3.4.2</b> | Modular Ocean Model                                                | $0.5^{\circ} \times 0.5^{\circ}$<br>50 layers   | ERA-interim | 1980–<br>2019    |
| <b>ECCOv4r3</b>  | Massachusetts Institute of Technology<br>General Circulation Model | $0.5^{\circ} \times 0.5^{\circ}$<br>50 layers   |             | 1992–<br>2015    |
| <b>ORAS5</b>     | Nucleus for European Modelling of the<br>Ocean                     | $0.25^{\circ} \times 0.25^{\circ}$<br>75 layers |             | 1958–<br>present |

530
